# Supplementary material for: The Memory of Rice Response to Spaceflight Stress: From the Perspective of Metabolomics and Proteomics
Source: MDPI journal article supplement (doi:10.3390/ijms23063390), 2022-03-21
Supplement: s1 [file s1]

**Table S8. Primers used in the qRT-PCR analysis.**

| name                                | Forward primer (5'–3') | Reverse primer (5'–3') |
|-------------------------------------|------------------------|------------------------|
| Superoxide dismutase [Cu-Zn]        | GGTGTAGCTGAGGCAACCAT   | AACAACACCGCATGCAAGTC   |
| glutathione transferase             | CCTACTGGCTGGAGGTGCTA   | CGCGACAGCAACATTATCCC   |
| Sodium/calcium exchanger NCL1       | CAGCTATGCAGCTCGGATCA   | TAGGCAAGCACAAGCGAGAA   |
| Calcium homeostasis regulator chor1 | TTCAGCGAGTGTATGAGCCG   | GGAACCTCCTTGGAGTGTGGG  |
| GRAM domain                         | CGCCTGTGACCAATACTCA    | TACCGCGTGATCGTCATCAG   |
| Class III peroxidase 65             | CTGATTCCGTTGGAGGCTAGG  | ATCTCCATCTCGAAGCGGTG   |
