# Supplementary material for: The Memory of Rice Response to Spaceflight Stress: From the Perspective of Metabolomics and Proteomics
Source: Int J Mol Sci. 2022 Mar 21;23(6):3390. doi: 10.3390/ijms23063390 (PMC8954569; doi:10.3390/ijms23063390)
Supplement: Supplementary file 1 [file ijms-23-03390-s001.zip]

Archive with 9 entries (9 files):
- FigS.pdf
- table S1.xls
- Table S2.xls
- table S3.xls
- table S4.xls
- Table S5.xls
- Table S6.xls
- Table S7.xls
- Table S8.pdf
