# Supplementary material for: The Memory of Rice Response to Spaceflight Stress: From the Perspective of Metabolomics and Proteomics
Source: Int J Mol Sci. 2022 Mar 21;23(6):3390. doi: 10.3390/ijms23063390 (PMC8954569; doi:10.3390/ijms23063390)
Supplement: Supplementary file 1 [file ijms-23-03390-s001.zip › table S1.xls]

## Sheet: Sheet1
Table S1. Differentially expressed protein in leaves of TLS
Uniport ID	Description	Fold Change	P-value
G8DML2	Starch synthase 1	0.74	0.0294
Q33AE4	Phosphoglucomutase/phosphomannomutase	0.73	0.0266
B8AUJ2	starch synthase	0.74	0.0284
A2YAT3	Annexin	0.75	0.0419
Q2R0I2	ciliary rootlet coiled-coil protein 2	1.38	0.0133
Q8HCR5	ATP synthase protein	0.75	0.0381
A2YMM8	KR domain	0.74	0.0311
A2ZXX0	Alcohol dehydrogenase GroES-like domain	0.76	0.0458
B8B5M9	26S proteasome non-ATPase regulatory subunit	0.75	0.0387
B8A9T5	Inherit from NOG: Thylakoid membrane phosphoprotein 14 kDa	0.74	0.0318
Q6YPF1	Fructose-bisphosphate aldolase	1.32	0.0343
Q7XTT4	Nucleolin 2	1.4	0.0102
A2YXG9	CLASP N terminal	1.3	0.0437
Q6K6K7	Ubiquitin-like modifier-activating enzyme 5	1.35	0.0203
Q6ESP9	Rapid ALkalinization Factor (RALF)	1.44	0.0055
B8AXJ0	ATP-dependent Clp protease proteolytic subunit	0.58	0.0001
Q65X86	Glycosyltransferase	0.76	0.0466
Q10MC6	Pre-mRNA-splicing factor ATP-dependent RNA	0.72	0.0175
B8B7B1	187-kDa microtubule-associated protein AIR9	1.33	0.0277
B9F2B8	Hsp70 protein	0.76	0.0481
Q8LQP4	Os01g0676200 protein	1.47	0.0034
Q8S3P1	phosphatase 2C	1.52	0.0014
Q0D401	Carboxypeptidase	1.33	0.0311
Q10FX7	general negative regulator of transcription subunit 3	1.34	0.027
P0C445	50S ribosomal protein L22, chloroplastic	1.39	0.0112
A2XWA1	Protease inhibitor/seed storage/LTP family	1.32	0.0328
I6QM82	Aquaporin	1.53	0.0013
Q9FWP8	Cortical cell delineating protein	1.33	0.0279
A0A0P0V7M3	Malic enzyme	1.36	0.0191
A2XHG1	AAI	1.49	0.0023
Q7XII4	Remorin 4.1	1.36	0.0188
C7IZV0	Anticodon-binding domain of tRNA	1.41	0.0084
B9FN78	reductase	0.75	0.0394
B9ETJ5	serine threonine-protein kinase	0.61	0.0004
A2Z620	Uncharacterized protein	1.72	0
Q8W5H5	Uncharacterized protein	0.76	0.0468
A2XYG7	Lipase (class 3)	0.76	0.0471
Q10NH1	reductase	0.74	0.0309
B9FQ22	alpha/beta hydrolase fold	0.68	0.0064
B8ARS9	STYKc	1.4	0.011
B8ADS2	MLO-like protein	0.73	0.0261
Q5ZCL1	UTP-glucose-1-phosphate uridylyltransferase	1.46	0.0036
Q84MR4	serine/threonine protein kinase	1.32	0.0341
Q8SAZ8	Putative polyprotein	0.75	0.0367
A0A0P0VXM7	Terpene synthase family, metal binding domain	0.72	0.0189
A0A0P0XBR6	family member	1.31	0.0406
Q5KQK1	Phosphoinositide 3-kinase C2	1.32	0.0322
H2KWR0	Rhodanese-like domain containing protein	1.47	0.0034
B9F362	Beach	1.3	0.0419
B8APR3	Alcohol dehydrogenase GroES-like domain	1.51	0.0017
A2ZQK8	Cytochrome p450	1.45	0.0044
A2X5I7	Protein of unknown function (DUF1624)	0.68	0.0066
A3A4E0	Os02g0208500 protein	1.47	0.0031
A2WWB2	PPR repeat	1.32	0.033
Q9FWK4	Cyanate hydratase	1.43	0.0062
B7EZ20	cDNA clone:001-208-C08, full insert sequence	1.37	0.017
Q6H759	Copper chaperone homolog CCH	1.54	0.0011
Q657L8	Peptidylprolyl isomerase	1.43	0.0067
Q6Z3V7	Putative Photosystem I reaction center subunit IV	1.35	0.0228
Q6ER49	Peroxidase	1.32	0.0338
A2YQC8	PI-PLC X domain-containing protein	1.5	0.0019
A2YLQ3	Phosphoadenosine phosphosulfate reductase family	0.75	0.039
A2WXH7	CRAL/TRIO, N-terminal domain	1.39	0.0126
Q0DJF5	Inherit from strNOG: One helix protein	0.67	0.004
A6N1U0	Non-cyanogenic beta-glucosidase	1.56	0.0007
Q53JF7	ABA/WDS induced protein	1.38	0.0144
D5L620	CIN1	1.54	0.001
C7J0H4	Os03g0250801 protein	1.67	0.0001
B8AXD5	IQ calmodulin-binding motif	1.33	0.0296
Q2QZQ9	NB-ARC domain containing protein	0.72	0.021
Q6ZD66	Pentatricopeptide repeat-containing protein	1.4	0.0102
B8B4T1	Cellulose synthase	0.72	0.0192
Q67W64	Methyltransferase-like	0.64	0.0013
A0A0P0XV74	oxidoreductase	1.3	0.0439
Q851K0	Germin-like protein 3-5	1.82	0
A2YDP9	GDSL-like Lipase/Acylhydrolase	1.5	0.002
Q8W2Z2	Putative exohydrolase	1.54	0.0011
Q0DB64	Ribulose bisphosphate carboxylase large chain	0.61	0.0004
B8AH11	PGAP1-like protein	0.75	0.0402
A2X9U5	CAAD domain-containing protein	0.62	0.0007
A2ZK08	stem 28 kDa	1.49	0.0024
Q0J6W9	lutamyl-tRNA reductase-binding protein	0.74	0.0292
Q8S936	BLE2 protein	1.43	0.0068
A2XGY9	Terpene synthase family, metal binding domain	1.43	0.0066
Q84YW7	Os07g0145866 protein	0.73	0.0274
Q53RJ3	Protein kinase domain containing protein	0.7	0.0103
B8BJ11	GRAS domain family	1.47	0.0033
Q5VPE9	Leucine carboxyl methyltransferase 1 homolog	1.34	0.0243
Q0D5W6	Protein translation factor SUI1 homolog	1.43	0.0063
Q9FU74	Mitochondrial glycoprotein	1.35	0.0219
Q6ESW3	Glycosyltransferase	1.6	0.0003
Q9LI34	Putative importin-alpha re-exporter	0.74	0.0287
A0A0P0V4J7	NBS-LRR-like protein	1.42	0.0078
Q7XHW0	Hexosyltransferase	1.39	0.0115
B8B8Z8	Transmembrane 9 superfamily member	1.79	0
Q10SU2	Expressed protein	0.71	0.0134
A2YSQ3	Xyloglucan endotransglucosylase/hydrolase	1.95	0
Q9SNN5	linker histone H1 and H5 family	1.38	0.0137
A2XFL2	eIF2-alpha	0.65	0.0019
B8BLL5	prolyl-tRNA synthetase	1.79	0
P0C338	NAD(P)H-quinone oxidoreductase subunit J, chloroplastic	0.75	0.044
B8BHC8	PRP19 PSO4 pre-mRNA processing factor 19 homolog	1.33	0.0274
A2ZBH5	Dabb	0.75	0.0378
Q53NE2	Retrotransposon protein, unclassified	1.92	0
A3CCL4	Domain of unknown function (DUF3444)	1.3	0.0437
A0A0P0V2X3	Os01g0393200 protein	0.75	0.0365
Q9MB13	Protein disulfide isomerase	1.31	0.0402
Q5N7X2	Uncharacterized conserved protein (DUF2358)	1.37	0.0151
A0A173CU24	Cytochrome b6-f complex subunit 4	0.68	0.0057
Q5Z6T5	Os06g0538900 protein	1.44	0.0052
Q5VNW4	Uncharacterized protein	1.66	0.0001
Q6ER51	Class III peroxidase 30	1.36	0.0193
A0A0P0WEZ7	BEST Arabidopsis thaliana protein match is	1.68	0.0001
Q2R2E8	KE2 family protein	0.73	0.0237
A3C6F1	CYP 450 A81	1.32	0.0333
A2YIQ8	early light-inducible protein	0.66	0.0025
Q6L5I4	Aldehyde dehydrogenase	0.76	0.0493
B8A841	ATP-binding cassette, sub-family B (MDR TAP)	0.76	0.0469
A2Z8P9	Cytochrome P450	0.76	0.0459
Q7XXS0	ATP synthase subunit d	1.37	0.0163
A2XLF2	Actin-1	1.4	0.0099
A2WKS3	Histone H2B.10	1.53	0.0012
A3CFL5	BTB/POZ domain-containing protein At2g13690	1.33	0.0298
A2X7G8	aquaporin PIP2-2	1.36	0.02
Q84ZC4	PPR repeat	1.33	0.0296
Q7XIW5	CBL-interacting protein kinase 29	0.76	0.0468
Q0DKA1	MAR-binding filament protein 1	0.74	0.032
A2XRV1	Uncharacterized protein	1.62	0.0003
Q8H068	NB-ARC domain containing protein	1.31	0.0363
Q6EPJ0	Ankyrin-like protein	2.65	0
Q65XV6	Tim17/Tim22/Tim23/Pmp24 family	0.74	0.0313
Q5Z7J2	Peroxidase	1.64	0.0002
A3A9Z4	Dehydrin family	1.49	0.0023
A2X304	GDSL-like Lipase/Acylhydrolase	1.33	0.0311
Q6H3Z5	Uncharacterized protein	1.43	0.0061
B8A823	Putative uncharacterized protein	2.7	0
Q2QMT2	B3 domain-containing protein	1.46	0.0037
Q0JMY8	Salt stress-induced protein	0.7	0.0095
A2X8P7	9-cis-epoxycarotenoid dioxygenase 1	0.72	0.0191
B8ATR4	Putative uncharacterized protein	0.75	0.0365
Q75HX0	Actin	0.75	0.0372
Q5CAF8	U3 small nucleolar RNA-associated protein 10	0.65	0.0017
Q8LJJ2	Threonine synthase	0.76	0.049
Q5JM79	TOM7 family	0.6	0.0003
B8AX04	40S ribosomal protein S7	0.74	0.0327
A2YE70	Transmembrane 9 superfamily member	0.66	0.0029
Q9SMB1	Spermidine synthase 1	0.65	0.0021
A0A0N7KHL1	Os03g0589450 protein	0.64	0.0014
Q656J2	Reticulon-like protein	1.35	0.0211
B8AMI0	PAS fold	1.44	0.0058
Q0JDV7	F-box LRR-repeat protein	1.39	0.0126
A0A0P0UZW5	DNA polymerase subunit Cdc27	1.32	0.0314
Q852L3	Plant lipid transfer protein	0.73	0.0259
A2XF66	Histone H2B.1	1.4	0.0106
C7J524	Small nuclear ribonucleoprotein-associated protein	0.75	0.0365
A2XQK0	methyltransferase	0.65	0.002
B8B8I3	PHD finger protein ALFIN-LIKE 2	0.69	0.0083
P0C507	DNA-directed RNA polymerase subunit beta''	0.7	0.0097
Q6F3A5	Beta-Ig-H3 domain-containing protein	1.36	0.0198
Q8H4Z0	linker histone H1 and H5 family	1.36	0.0179
Q5N7F1	eukaryotic translation initiation factor	1.41	0.0092
P0CD19	NAD(P)H-quinone oxidoreductase subunit 2 B	0.59	0.0001
A2WPE8	Uncharacterized protein	1.38	0.0133
Q5VS71	SEC16 homolog B	0.62	0.0007
A6N1C2	Proline-rich protein	1.85	0
A2XR63	Transketolase, thiamine diphosphate binding domain	0.73	0.0244
Q8LJ88	Caspase domain	1.34	0.0252
C7IX89	Uncharacterized protein	0.25	0
A0A0P0Y6A6	Non-specific lipid-transfer protein	1.38	0.0141
A3BKU8	oxygen-evolving enhancer protein	1.43	0.0066
A3ATD8	Uncharacterized protein	0.75	0.0366
A2YBX1	Anthocyanidin 3-O-glucosyltransferase	2.62	0
A0A0P0UZ39	Taurine catabolism dioxygenase TauD, TfdA family	0.64	0.0014
Q10MF8	Enoyl-CoA hydratase	0.74	0.0313
B8A6J6	phosphoribosyl-aminoimidazole carboxylase	0.69	0.0076
A2YYU4	STYKc	0.65	0.0019
A2X8Y7	Tim17/Tim22/Tim23/Pmp24 family	0.69	0.0092
B8B7B6	40S ribosomal protein S12	0.53	0
B9EYD6	WD domain, G-beta repeat	0.72	0.0188
A2ZHH3	Protein of unknown function (DUF1191)	0.75	0.0435
B8AGT3	RmlD substrate binding domain	0.71	0.0141
Q69XG4	Eukaryotic aspartyl protease	0.64	0.0013
Q9FTU2	replication factor A1	0.75	0.0408
B9F2Y1	Anticodon-binding domain	0.7	0.0123
Q94LD1	Retrotransposon protein	0.52	0
B8B3Y6	protein TIC 22	0.75	0.037
Q8GZX2	LOC496359 protein	0.67	0.0038
A2YNU3	Trm112p-like protein	0.74	0.031
Q69MS4	Uncharacterized protein	0.7	0.0119
A2XSY1	Dolichyl-diphosphooligosaccharide--protein glycosyltransferase subunit DAD1	0.69	0.0091
A0A0P0WAR0	Mitochondrial carrier protein	0.66	0.0029
B8BCA3	Cytochrome p450	0.61	0.0003
Q10PB0	Expressed protein	1.34	0.0252
H2KWA4	Auxin-repressed protein-like protein ARP1	1.44	0.0051
A0A0P0XM98	NB-ARC domain	0.67	0.0046
Q7F8Y3	Isocitrate lyase family	0.67	0.0039
A2X4J6	Inherit from strNOG: flowering-promoting factor 1-like protein	0.73	0.0251
B9F844	NifU-like domain	0.54	0
H2KWD9	U2 snRNP auxiliary factor large subunit	0.61	0.0003
B8AJZ8	cell cycle checkpoint protein	1.49	0.0022
Q8GS22	Dirigent protein	0.53	0
B9F1V4	PP2Cc	0.58	0.0001
A2Y6B1	Protein of unknown function (DUF569)	1.67	0.0001
Q2R4K6	Transposon protein, CACTA, En/Spm sub-class	0.64	0.0013
B9F9T3	mitochondrial import receptor subunit TOM6 homolog	0.61	0.0003
P0CH34	Ubiquitin-60S ribosomal protein L40-1	1.56	0.0007
Q0DE33	Protein kinase domain	1.54	0.001
B7FA23	AMP-binding enzyme	0.74	0.0292
A2YVH9	Inherit from KOG: Set and mynd domain containing	0.47	0
Q2QXR8	Pyruvate kinase 2	0.73	0.0225
B9FBZ7	eIF-4A	0.75	0.0378
Q2R2R8	NB-ARC domain containing protein	1.32	0.0359
A6N0J3	Phosphatidylinositol-4-phosphate 5-kinase 1	0.7	0.0121
Q8S5P6	Putative transposase	0.51	0
A6N0D7	Dehydrin 13	2.7	0
Q5Z7N3	HMG protein	1.43	0.0063
A3BMM4	WD40-like Beta Propeller Repeat	0.42	0
B9FTU9	Cytokinin dehydrogenase 1	0.28	0
Q01KI5	H0404F02.12 protein	0.72	0.0216
B9FXW5	Uncharacterized protein	0.68	0.0067
A0A0P0X8Y8	GRAM domain	0.36	0
A2YJ49	Protein of unknown function (DUF3252)	2.18	0
Q75I74	Uncharacterized protein	0.7	0.012
Q10LK7	ATP-dependent Clp protease proteolytic subunit	0.53	0
Q7X914	p0076O17.9 protein	0.32	0
A0A0P0X8M4	Uncharacterized protein	1.3	0.0432
B8BN11	Transketolase, C-terminal domain	0.55	0
Q6Z2K0	G-protein alpha subunit	0.63	0.0009
Q8LHD1	Hydantoinase B/oxoprolinase	0.69	0.0073
Q9LWS2	60S ribosomal protein L13	0.67	0.0049
A6N1L7	Calcium homeostasis regulator chor1	0.69	0.008
B8AKU1	OST3	0.61	0.0005
Q5QNI2	Sodium/calcium exchanger NCL1	0.49	0
A3ABX4	Adenylate kinase	0.71	0.0157
A2WRH9	Protein transport protein Sec61 subunit beta	0.7	0.0094
Q0JE02	cell division cycle 5	0.68	0.0051
Q84T44	Putative copia protein	0.47	0
B8BMF9	Pathogenesis-related protein	0.67	0.0044
A2ZNT1	Multicopper oxidase	0.58	0.0001
Q7XN85	ATPase family associated with various cellular activities (AAA)	0.52	0
Q7X7Y2	Retrotransposon protein	0.5	0
Q7XBA6	Non-specific lipid-transfer protein	1.43	0.0064
B8AWE3	PPR repeat	1.43	0.006
Q5VPK4	Protein of unknown function (DUF295)	0.65	0.0024
Q10NC7	Oxysterol-binding protein	0.36	0
Q01IF7	H0805A05.13 protein	0.54	0
B8A8N5	myosin, heavy chain	1.39	0.0117
B9EZU1	Retrotransposon protein	1.44	0.0059
Q6I544	Germin-like protein 5-1	0.73	0.0249
B8B0R0	homeobox protein knotted-1	0.63	0.0011
A0A0P0X6Q1	RNA helicase (UPF2 interacting domain)	0.68	0.0065
Q10L35	Expressed protein	0.51	0
Q8GRZ3	Os07g0162600 protein	0.59	0.0002
Q6Z402	Membrane lipoprotein lipid attachment site-containing protein-like	0.33	0
Q5NA87	Uncharacterized protein	0.67	0.0044
A0A0P0W5P1	AFG1-like ATPase	0.49	0
Q0D4Z3	Got1/Sft2-like family	0.7	0.0117
A2YEZ8	Putative glycosyl hydrolase of unknown function (DUF1680)	0.4	0
A2XIF5	Protein of unknown function, DUF594	0.6	0.0002
Q10QE5	Retrotransposon protein	0.7	0.0117
Q5SN38	Inherit from strNOG: function DUF1296 domain containing protein	0.63	0.0008
Q8H8B3	STYKc	0.7	0.0121
Q75J33	Putative Gag and Pol polyprotein	1.74	0
A2ZPH0	Glycosyltransferases	0.64	0.0016
B8AAQ3	Repressor protein	0.61	0.0004
Q2QU11	Retrotransposon protein	1.33	0.0313
Q6Z3Q4	mTERF	1.61	0.0003
A0A0N7KSQ1	nuclear ribonucleoprotein Q	0.57	0.0001
Q0JCL9	Dynein light chain type 1	0.46	0
Q69MP9	Uncharacterized protein	0.12	0
Q0DY61	transposon protein	1.54	0.0011
Q7X6S7	EB1-like C-terminal motif	0.74	0.032
Q5VNU8	Uncharacterized protein	1.37	0.0151
Q0J7E9	transposon protein	0.68	0.0064
Q0DIK0	Mitochondrial fission 1 protein	0.54	0
A0A0P0XSC9	Plant protein of unknown function (DUF641)	0.26	0
Q944E9	ATP-binding protein	0.69	0.0073
B8BFS3	Amidase domain-containing protein	0.41	0
A2YZZ9	Transposon protein	1.49	0.0023
Q5QLE5	Putative acyl-CoA synthetase	0.74	0.0344
B2ZX90	Chromatin assembly factor 1 subunit FSM	0.29	0
Q10P12	V-type proton ATPase subunit a	0.73	0.0226
Q93WY5	Glutathione S-transferase	0.66	0.0029
Q10RN9	small GTP-binding protein RAB5B	0.28	0
Q761Z0	BRI1-KD interacting protein 124	1.31	0.0383
B9FLZ8	Ankyrin repeat	0.74	0.0291
B9FQL8	Cadmium/zinc-transporting ATPase	0.66	0.0027
Q0D9J0	Os06g0713900 protein	0.73	0.0262
Q5JJV9	Amino acid kinase	0.5	0
B9GBU7	Domain of unknown function (DUF2828)	0.26	0
A0A0P0Y1L0	peptidase C1 family	1.35	0.0233
A2YPT8	Rubber elongation factor protein (REF)	0.7	0.0123
Q6YUM1	Retrotransposon protein	1.34	0.0263
Q01IY5	Amine oxidase	1.33	0.0295
Q6E6T0	ATP-dependent Clp protease proteolytic subunit	0.72	0.0206
A2YI66	Uncharacterized protein	1.32	0.0319
Q7XMK5	OSJNBb0039L24.13 protein	1.32	0.0359
Q6Z5B2	Beta-amylase	0.74	0.0312
Q84NN4	Thioredoxin-like protein CDSP32	0.7	0.0119
A2WNR8	Peroxidase	1.68	0.0001
A2YI72	Domain of unknown function DUF221	1.38	0.0146
A2YCI2	Major intrinsic protein	1.36	0.0185
Q75K72	putative beta-1,3-glucanase	1.52	0.0015
Q69RN2	GTPase activating protein 1	1.75	0
A0A0E4G0P6	Developmentally regulated plasma membrane polypeptide	1.53	0.0013
A0A0P0XR31	Peroxidase	1.42	0.0073
Q0J9V5	Thioredoxin-like protein CXXS1	1.52	0.0016
Q9AWV5	Putative Bowman Birk trypsin inhibitor	1.38	0.013
A3A7I6	Uncharacterized protein	1.35	0.0218
Q5Z9Z3	Thioredoxin-like protein Clot	1.33	0.0307
A2YC52	Peroxidase	1.46	0.0041
B8B4L9	Tubulin binding cofactor C	0.69	0.0074
Q8H4J8	Aldo/keto reductase family-like protein	0.75	0.0361
Q8H5N9	Probable aquaporin PIP2-1	1.8	0
B9FIU4	Uncharacterized protein	2.37	0
B7F5J7	cDNA clone:J013029P18, full insert sequence	1.58	0.0005
B8ANR9	30S ribosomal protein 1	1.59	0.0004
Q0D840	Thioredoxin H1	1.46	0.0038
Q5VP33	Os06g0148200 protein	1.85	0
Q7XLR1	Probable aquaporin PIP2-6	1.93	0
Q6ZCR3	Germin-like protein 8-12	2.22	0
A2WRM1	Putative uncharacterized protein	1.9	0
Q5U1N4	Class III peroxidase 59	1.45	0.0047
A2ZWD3	Uncharacterized protein	2.29	0
Q01L93	H0622F05.3 protein	1.36	0.0196
B7FA34	cDNA, clone: J100040M09, full insert sequence	0.7	0.0116
Q0D5Z0	Os07g0523600 protein	0.71	0.0149
D7S0L8	Osmotin-like protein	0.75	0.0367
A6MZH2	Bowman-Birk type bran trypsin inhibitor	1.67	0.0001
Q8H4P7	Os07g0147500 protein	1.7	0.0001
Q851P9	Histone-like protein	1.86	0
A2Y4F6	chitinase	0.39	0
Q8H7U1	Tubulin beta-2 chain	0.66	0.0031
Q84PB1	Phosphoribosylanthranilate transferase	0.75	0.0368
Q60D98	stem 28 kDa	1.76	0
Q5VRY1	18.0 kDa class II heat shock protein	0.67	0.0044
A2Y9J6	GDSL-like Lipase/Acylhydrolase	1.84	0
Q20IJ5	Thiamine thiazole synthase, chloroplastic	0.65	0.0024
Q7XTY1	OSJNBa0019K04.16 protein	0.67	0.0039
Q6ZI95	Purple acid phosphatase	0.75	0.0387
A3BAC7	Uncharacterized protein	1.39	0.0117
A2WMG6	Salt stress root protein RS1	2.07	0
Q6AVZ8	Class III peroxidase 65	1.39	0.0112
B8ANU7	YTH domain-containing protein	0.71	0.0163
A0A0P0YCG8	Os12g0629600 protein	0.76	0.0484
Q03200	Light-regulated protein	2.44	0
B8ABG6	Uncharacterized protein	0.76	0.0481
A2XSY5	Myb-like domain-containing protein	1.31	0.0364
A2ZLU1	Putative uncharacterized protein	0.75	0.0364
Q6ZBZ2	Germin-like protein 8-14	1.38	0.0136
A2YWV7	Lipoxygenase	0.6	0.0003
Q10SU0	remorin	3.07	0
B8BKE8	Cytochrome P450 71C1	0.74	0.0337
A2XN31	Cupin domain	1.83	0
B8AX06	UbiA prenyltransferase family	1.34	0.0264
Q10F16	2Fe-2S iron-sulfur	0.76	0.0496
A2WU25	Sterol 24-c-methyltransferase	0.47	0
A2Y9Y7	Heparanase	1.33	0.028
A0A0P0W4K0	Os03g0807700 protein	0.63	0.001
Q0DTX5	Superoxide dismutase [Cu-Zn]	0.59	0.0002
A0A0P0VUH2	Os03g0203900 protein	0.57	0.0001
Q6L5I6	protein IQ-DOMAIN 31	0.66	0.0034
P0C5A4	Late embryogenesis abundant protein, group 3	1.87	0
