# Supplementary material for: The Memory of Rice Response to Spaceflight Stress: From the Perspective of Metabolomics and Proteomics
Source: Int J Mol Sci. 2022 Mar 21;23(6):3390. doi: 10.3390/ijms23063390 (PMC8954569; doi:10.3390/ijms23063390)
Supplement: Supplementary file 1 [file ijms-23-03390-s001.zip › Table S2.xls]

## Sheet: Sheet1
Table S2. Differentially expressed protein in leaves of TS
Uniport ID	Description	Fold Change	P-value
O64437	Inositol-3-phosphate synthase 1	1.33	0.0291
Q10AX9	Nicotinate phosphoribosyltransferase	1.57	0.0005
B8AV88	TPR	1.35	0.0197
A2XHR6	40S ribosomal protein SA	1.38	0.0127
B8AU84	Arginase 1	1.32	0.0341
A2ZAT2	Non-specific lipid-transfer protein	1.35	0.0215
B9FS66	Pyridine nucleotide-disulphide oxidoreductase	0.71	0.025
Q0JIF8	ribosomal protein L34	0.73	0.0356
A0A0P0V679	Saposin-like type B, region 2	1.45	0.0041
Q65X55	RNA-directed DNA methylation 3	0.73	0.0395
Q0INR8	Wound-inducible basic protein family	1.51	0.0014
Q8S9S2	Vesicle transport v-SNARE protein N-terminus	0.74	0.0465
B8BJ95	Protein of unknown function (DUF793)	0.69	0.0144
Q8W0C4	Elongation factor	0.73	0.0386
B8BHT2	Methionine aminopeptidase	0.67	0.0081
A2WPA2	Peroxidase	0.72	0.0295
Q9SXX7	Cytochrome c oxidase subunit 5C	1.31	0.041
A0A0P0Y0U8	alpha/beta hydrolase fold	0.73	0.0386
A2XDU4	Uncharacterized protein	1.47	0.0031
Q5JKK9	glucan endo-1-3-beta-glucosidase	0.63	0.002
Q0DQ04	DNA-directed RNA polymerase	1.34	0.0233
A2XXN3	OTU-like cysteine protease	0.69	0.0153
A0A0P0WTA4	histone H3	1.34	0.0245
Q2QMG2	Methylcrotonoyl-CoA carboxylase subunit alpha	0.69	0.0126
Q5QLJ2	AMSH-like ubiquitin thioesterase 3	1.33	0.0302
A2ZVC0	Cytochrome c oxidase subunit Vb	1.42	0.007
Q9ZRJ5	L-lactate dehydrogenase	0.73	0.0384
Q7XBR2	ATP-dependent Clp protease proteolytic subunit	1.46	0.0037
Q6QN20	Glutathione S-transferase GSTF14	1.47	0.0031
Q7X6F6	Glycosyl hydrolase family 3 N terminal domain	1.35	0.0225
Q6H6L8	Protease inhibitor/seed storage/LTP family	1.35	0.0203
Q84MP7	Probable histone H2A variant 3	1.4	0.0101
Q6ZBP3	Histone H2B.2	1.56	0.0006
B9EXH9	histone H2A	0.68	0.0118
B8BLP2	triglyceride lipase activity	0.7	0.0162
Q6YSB4	Cytochrome p450	0.71	0.0237
Q2QTH8	WD repeat-containing protein GTS1	0.73	0.0353
B9EXD7	Domain of unknown function (DUF3437)	0.7	0.0176
B9EXP6	Uncharacterized protein	0.72	0.0286
C7J0A2	DNA topoisomerase 3-alpha	0.73	0.0346
H2KW67	Expressed protein	0.74	0.0454
Q9FEB7	tRNA (Uracil-5-)-methyltransferase	0.73	0.0364
A0A0P0V6T5	Putative lysophospholipase	0.74	0.0425
B8AI27	Peptidase family M48	0.75	0.0496
A0A0P0WZW8	source UniProtKB	1.3	0.0436
B8BI36	Ribosomal protein L.2	1.31	0.0375
B9FMD2	Uncharacterized protein	1.43	0.0054
A0A0P0X3Z4	Os07g0218766 protein	1.33	0.0296
Q5ZDM8	Protein of unknown function (DUF3681)	1.32	0.033
A2WQ80	Protein of unknown function (DUF679)	1.31	0.0386
A3AGP9	ABC-2 type transporter	1.57	0.0004
Q6K4V9	Ergosterol biosynthesis ERG4/ERG24 family	1.3	0.0442
A3CBM3	Retrotransposon protein	1.45	0.0038
B9FDY0	Methyl-CpG binding domain	1.41	0.0074
B8ALL8	asparagine synthetase	0.65	0.0043
Q69LE4	Os07g0168600 protein	1.33	0.0283
D7PPJ8	ADH1	0.7	0.0194
A2WXW7	Calreticulin family	1.43	0.0062
P0C2Y5	ATP synthase subunit a	1.47	0.0029
Q2QPD1	Acyl carrier protein	1.55	0.0007
Q75GR8	Inosine-uridine preferring nucleoside hydrolase family protein	1.56	0.0005
Q7XCK0	Glutathione S-transferase	1.36	0.0171
A2XZW9	Protein of unknown function (DUF1668)	0.73	0.0363
B9FZE9	Homeobox-leucine zipper protein ROC1	1.48	0.0024
Q53LC4	Transposable element protein	1.33	0.0278
A0A0P0WPF1	Retrotransposon protein	1.53	0.0009
A0A0R7VIM3	Cysteine proteinase inhibitor	1.31	0.037
Q6Z4B7	UDP-glucoronosyl and UDP-glucosyl transferase	1.41	0.0079
Q6Z670	nucleoid DNA-binding protein cnd41	1.44	0.0045
B8B1I1	Protein CWC15 homolog	0.72	0.0299
Q655P5	Pectinesterase	1.39	0.011
B8A892	Uncharacterized protein	0.65	0.0041
Q6ETN3	Probable 4-coumarate--CoA ligase 3	0.66	0.006
A3AU69	calmodulin binding protein	1.38	0.0136
B8ATW8	Inherit from COG: polyamine binding	1.35	0.022
Q9S7W9	Beta-1	0.74	0.0415
B8ARB3	Uncharacterized protein	1.32	0.0313
B8BLU5	ULP_PROTEASE domain-containing protein	1.44	0.0049
Q9FU69	Glycosyltransferase	1.44	0.0053
B7F2I6	Leucine Rich Repeat family protein	0.58	0.0004
Q8W3F4	Epoxide hydrolase	2.19	0
B9F140	Polyribonucleotide nucleotidyltransferase, RNA binding domain	0.66	0.0061
Q7G754	Hsp20/alpha crystallin family protein	1.5	0.0018
B8B0Z9	HP domain-containing protein	0.71	0.0236
Q7XJ09	Chloroplast RNA processing 1-like protein	1.56	0.0006
Q259E2	B0213E10.3 protein	1.66	0.0001
Q7XDI2	Uncharacterized protein	1.63	0.0002
Q6L4H1	nonspecific lipid-transfer protein	1.42	0.0071
Q7XQK2	HMG protein	1.32	0.0318
A0A0P0XWY0	HI0933-like protein	1.32	0.0318
B9FZF5	polyadenylate-binding protein RBP45	1.63	0.0002
A2XS65	Cysteine proteinase inhibitor 10	0.67	0.0087
Q0E4I9	TLR4 regulator and MIR-interacting MSAP	0.71	0.0205
Q7XLE6	Retrotransposon protein	1.53	0.0009
B8AFE6	Serine Threonine protein kinase	0.75	0.0497
B8B8Q8	STYKc	0.68	0.0116
A2ZHH8	hydrolase, alpha beta fold family protein	1.38	0.0128
Q6ES10	Histone acetyltransferase type B catalytic subunit	1.37	0.0149
B8BK60	haloacid dehalogenase-like hydrolase	0.61	0.001
Q2QT04	Retrotransposon protein	1.44	0.0046
Q2QU56	NB-ARC domain containing protein	1.31	0.0389
Q7XTK1	Elongation factor	1.35	0.0203
Q8S7T5	ATP synthase subunit alpha	1.56	0.0006
Q7XM53	linker histone H1 and H5 family	1.9	0
Q9LI27	Glutaredoxin	0.69	0.0141
Q8S1N3	subtilisin	1.42	0.0065
Q0IPW3	actin-7	1.32	0.0313
Q2QND6	Thaumatin family	1.36	0.017
A0A0P0Y4G7	oligouridylate-binding protein 1B	1.36	0.0179
Q0DQD8	Os03g0606200 protein	1.35	0.0207
Q53RP2	Remorin	1.38	0.0124
Q10S49	Glutathione S-transferase	1.31	0.0391
Q6K623	Lipocalin-like domain	0.66	0.0068
Q7G602	Flavonoid 3'-monooxygenase CYP75B3	1.37	0.0142
Q7X7F0	SDR family	0.7	0.0193
A0A0P0VG07	GTPase-activating protein AGD12	0.72	0.0279
O22438	Class III peroxidase 22.3	0.58	0.0004
Q2QP84	Uso1 / p115 like vesicle tethering protein, head region	0.65	0.0041
Q7XIK7	Putative guanine nucleotide-exchange protein GEP2	0.73	0.0345
P49216	40S ribosomal protein S26	0.74	0.0487
Q7F1H3	Blue copper-binding protein-like	1.34	0.024
A3ASU0	Plastocyanin-like domain	1.36	0.0172
A0A0P0VCZ6	Germin-like protein 1-3	1.45	0.004
B8BF75	Rubisco LSMT substrate-binding	1.49	0.002
B9FW35	Cytochrome b-c1 complex subunit 7	1.49	0.0021
A0A0P0Y018	Armadillo/beta-catenin-like repeat	0.72	0.0274
P93402	Aspartate kinase-homoserine dehydrogenase	0.7	0.0169
Q6ZHC0	Uncharacterised protein family (UPF0160)	0.67	0.0089
A2XD82	3-ketoacyl-CoA synthase	0.71	0.0231
Q6K7V6	Probable tocopherol cyclase	0.67	0.0079
Q5N760	NADH-cytochrome b5 reductase	0.69	0.0121
Q65WY6	Glutaminyl-tRNA synthetase	0.61	0.0013
Q2QY64	Heterogeneous nuclear ribonucleoprotein	1.45	0.0041
Q6ZCC4	Succinate dehydrogenase subunit 6	0.74	0.0423
B9G6B3	Nascent polypeptide-associated complex subunit beta	0.73	0.0384
B8BAT4	CDC48_2	1.43	0.0059
B9F2M6	Protein arginine N-methyltransferase	0.68	0.0102
Q6YSX0	60S ribosomal protein	0.59	0.0005
A0A0P0XV01	minor allergen Alt a	0.68	0.0116
A2XX95	Transferase family	0.74	0.0465
P28757	Superoxide dismutase [Cu-Zn] 2	0.56	0.0001
A0A146F8I4	Heading date 18	0.55	0.0001
B8AHS5	DEAD (Asp-Glu-Ala-Asp) box polypeptide 41	1.32	0.0324
A2WSQ5	Glycosyltransferase	0.66	0.0051
Q6K4D8	Hydrolase-like protein	0.68	0.0099
Q10EL8	Expressed protein	0.69	0.0129
A2Z2H8	Glycosyltransferase	0.61	0.0011
Q8LJL3	Farnesylated protein 2-like	0.68	0.0099
Q10LD4	Retrotransposon protein	0.68	0.0109
B8ATX9	Formin-like protein	0.72	0.026
A2XP50	Uncharacterized protein	0.69	0.0132
A2YSU3	4'-phosphopantetheinyl transferase HetI	0.74	0.0411
B8BEU0	Histone domain-containing protein	0.69	0.0149
Q7G750	AP2	0.73	0.033
B8ALW5	callose synthase	0.71	0.0203
A2XDC7	GEM protein 1	0.72	0.0265
Q7Y179	Glucan endo-1	0.74	0.0431
Q5VP52	Single-stranded DNA-binding protein WHY1	0.72	0.0307
A0A0P0V4V4	PP-loop family	0.67	0.0078
Q9LDL0	Peroxidase	0.46	0
Q6K8R0	eIF2A	0.7	0.0191
B8AV15	Amine oxidase	1.65	0.0001
A2WMG8	cyclin a	1.33	0.0305
Q7X8D9	Retrotransposon protein	0.73	0.0355
Q6Z894	ABC transporter transmembrane region	0.54	0
Q5JK99	PPR repeat	0.59	0.0006
Q6ZHS7	Uncharacterised protein family UPF0047	0.55	0.0001
Q6YUR8	Cold shock domain protein 1	0.7	0.0192
B8B696	Protein of unknown function (DUF789)	0.65	0.0043
A2WWL6	Malate dehydrogenase	0.56	0.0001
Q6K2L7	Uncharacterized protein	0.19	0
A2X2N4	Leucine rich repeat N-terminal domain	0.56	0.0001
Q10MM7	Uncharacterized protein	0.57	0.0002
B9EWJ9	DNA mismatch repair protein, C-terminal domain	0.61	0.001
Q75KA8	EF hand family protein	0.71	0.0202
B9FQR8	Galactokinase galactose-binding signature	0.56	0.0001
Q65XR9	Phospholipase D	0.61	0.0012
B8BKJ1	Uncharacterized protein	1.99	0
A0A0P0WG91	S-methyl-5-thioribose kinase activity	0.5	0
B8AET5	Uncharacterized protein	0.52	0
Q0DNW0	Photosystem I reaction centre subunit N	1.4	0.0092
B8AEM8	Photosystem II 5 kDa protein	1.58	0.0004
Q7M1Q3	Ribulose-bisphosphate carboxylase activase	1.32	0.0326
Q2QMG7	Os12g0605400 protein	0.64	0.0029
Q5VRZ6	RNA recognition motif	0.66	0.0061
A2YN19	MFS domain-containing protein	0.5	0
B8BIP8	Saposin-like type B, region 1 family protein	1.34	0.0243
A2ZAB3	60S ribosomal protein L27-3	0.69	0.0126
Q2QZS4	Retrotransposon protein	1.33	0.0276
A2ZIF8	Ribosomal protein L3	0.64	0.0033
B8BAF5	Ribosomal protein L37	0.62	0.0016
Q9FP98	TOM7-1	0.31	0
O22386	50S ribosomal protein L12	1.39	0.011
B8ALN4	UvrD_C_2 domain-containing protein	0.73	0.038
Q5ZDI5	Uncharacterized protein	0.74	0.0411
A2X7W5	Uncharacterized protein	0.74	0.0462
A0A1L8CFA1	Orf y protein	1.43	0.006
Q60ED4	Transposase family protein	0.71	0.0229
Q943L2	Histone H2B.11	1.34	0.0236
Q2QZQ0	Ribonucleases P/MRP protein subunit POP1 containing protein	0.73	0.036
Q7XMK3	Probable ascorbate-specific transmembrane electron transporter 2	1.82	0
A2XDU6	Uncharacterized protein	0.72	0.031
Q5Z5Z4	Putative Pib	1.5	0.0018
O22387	Glyceraldehyde-3-phosphate dehydrogenas	1.3	0.0437
Q2RBC7	Chalcone-flavonone isomerase family protein	1.44	0.005
Q5W796	TGS domain	0.58	0.0003
Q6Z965	12-oxophytodienoate reductase 7	0.69	0.0152
A2ZN77	Sucrose transport protein SUT2	0.62	0.0015
Q5N945	Plant nuclear matrix protein 1 (NMP1)	0.65	0.0041
B9EUX3	5'-3' exoribonuclease	0.67	0.0069
Q10FY5	Expressed protein	0.46	0
Q9ZWF5	Ribosomal protein L7	1.44	0.0052
A0A0P0XU37	Uncharacterized protein	0.18	0
Q8L5X0	60S ribosomal protein L36	0.71	0.0252
B9F4A7	serine/threonine-protein phosphatase PP2A	0.29	0
A3APY0	Uncharacterized protein	0.74	0.0443
B9G3V3	Uncharacterized protein	0.62	0.0018
B7EM86	cDNA clone:J033040F03	0.64	0.0029
Q5ZDX2	Os01g0615100 protein	1.37	0.0153
Q5VRI5	Cytochrome P450 93G2	1.56	0.0006
A2XRT6	Cysteine proteinase 1 precursor	0.62	0.0015
B8BJB0	Alba domain-containing protein	0.66	0.0055
A0A0P0WQK5	Os05g0566900 protein	0.47	0
Q2QPH0	Expressed protein	0.69	0.0146
A2YIQ8	early light-inducible protein	0.67	0.0068
Q6L5I4	Aldehyde dehydrogenase	0.74	0.0447
B8A841	ATP-binding cassette, sub-family B (MDR TAP)	0.73	0.0323
A2Z8P9	Cytochrome P450	0.71	0.0215
Q7XXS0	ATP synthase subunit d	1.31	0.0369
A2XLF2	Actin-1	1.35	0.0195
A2WKS3	Histone H2B.10	1.35	0.0205
A3CFL5	BTB/POZ domain-containing protein At2g13690	1.34	0.025
A2X7G8	aquaporin PIP2-2	1.44	0.0046
Q84ZC4	PPR repeat	1.38	0.0128
Q7XIW5	CBL-interacting protein kinase 29	1.35	0.0224
Q0DKA1	MAR-binding filament protein 1	1.3	0.0422
A2XRV1	Uncharacterized protein	1.9	0
Q8H068	NB-ARC domain containing protein	1.55	0.0007
Q6EPJ0	Ankyrin-like protein	0.59	0.0005
A2X8P7	9-cis-epoxycarotenoid dioxygenase 1	0.68	0.01
B8ATR4	uncharacterized protein	0.62	0.0014
C7J524	Small nuclear ribonucleoprotein-associated protein	0.73	0.0323
A2XQK0	methyltransferase	0.73	0.0356
B8B8I3	PHD finger protein ALFIN-LIKE 2	0.69	0.0136
P0C507	DNA-directed RNA polymerase subunit beta''	0.64	0.0035
Q6F3A5	Beta-Ig-H3 domain-containing protein	1.33	0.0274
Q8H4Z0	linker histone H1 and H5 family	1.43	0.0055
Q5N7F1	eukaryotic translation initiation factor	2.04	0
P0CD19	NAD(P)H-quinone oxidoreductase subunit 2 B	0.71	0.0218
B8AYI6	CRAL/TRIO	1.49	0.002
A2WPE8	Uncharacterized protein	1.52	0.0012
Q5VS71	SEC16 homolog B	1.46	0.0037
A6N1C2	Proline-rich protein	0.46	0
A2XR63	Transketolase, thiamine diphosphate binding domain	0.46	0
Q8LJ88	Caspase domain	0.73	0.034
C7IX89	Uncharacterized protein	2.58	0
A0A0P0Y6A6	Non-specific lipid-transfer protein	0.7	0.0185
A3BKU8	oxygen-evolving enhancer protein	1.59	0.0003
A3ATD8	Uncharacterized protein	0.73	0.0347
A2YBX1	Anthocyanidin 3-O-glucosyltransferase	0.74	0.0408
B7FA23	AMP-binding enzyme	0.66	0.0052
A2YVH9	Uncharacterized protein	0.63	0.0021
Q2QXR8	Pyruvate kinase 2	0.68	0.0091
B9FBZ7	eIF-4A	0.74	0.0456
Q2R2R8	NB-ARC domain containing protein	1.42	0.0072
A6N0J3	Phosphatidylinositol-4-phosphate 5-kinase 1	0.65	0.005
Q8S5P6	Putative transposase	0.72	0.0261
A6N0D7	Dehydrin 13	0.74	0.0404
Q5Z7N3	HMG protein	1.38	0.0139
A3BMM4	WD40-like Beta Propeller Repeat	0.57	0.0002
B9FTU9	Cytokinin dehydrogenase 1	0.48	0
Q01KI5	H0404F02.12 protein	0.46	0
B9FXW5	Uncharacterized protein	0.41	0
A0A0P0X8Y8	GRAM domain	0.65	0.0038
A2YJ49	Protein of unknown function (DUF3252)	1.41	0.0082
Q75I74	Uncharacterized protein	0.68	0.0098
Q10LK7	ATP-dependent Clp protease proteolytic subunit	0.48	0
Q7X914	p0076O17.9 protein	0.69	0.0155
A0A0P0X8M4	Uncharacterized protein	1.65	0.0001
Q9LWS2	60S ribosomal protein L13	0.74	0.0473
A6N1L7	Calcium homeostasis regulator chor1	0.65	0.005
B8AKU1	OST3	0.58	0.0004
Q5QNI2	Sodium/calcium exchanger NCL1	0.64	0.0027
B8B0R0	homeobox protein knotted-1	0.69	0.0128
A0A0P0X6Q1	RNA helicase (UPF2 interacting domain)	0.57	0.0002
Q10L35	Expressed protein	0.47	0
Q8GRZ3	Os07g0162600 protein	0.7	0.0172
Q6Z402	Membrane lipoprotein lipid attachment site-containing protein-like	0.4	0
Q5NA87	Uncharacterized protein	0.65	0.0047
A0A0P0W5P1	AFG1-like ATPase	0.55	0.0001
Q0D4Z3	Got1/Sft2-like family	0.58	0.0003
A2YEZ8	Putative glycosyl hydrolase of unknown function (DUF1680)	0.56	0.0001
A2XIF5	Protein of unknown function, DUF594	0.64	0.0033
Q10QE5	Retrotransposon protein	0.67	0.0085
Q8H8B3	STYKc	0.69	0.0156
Q5W707	DNA-binding protein-related	0.63	0.0021
Q75J33	Putative Gag and Pol polyprotein	1.35	0.0224
A2ZPH0	Glycosyltransferases	0.56	0.0001
B8AAQ3	Repressor protein	0.64	0.0035
Q2QU11	Retrotransposon protein	3.16	0
Q6Z3Q4	mTERF	1.94	0
A0A0N7KSQ1	nuclear ribonucleoprotein Q	0.6	0.0008
Q0JCL9	Dynein light chain type 1	0.51	0
Q69MP9	Uncharacterized protein	0.11	0
Q0DY61	transposon protein	0.59	0.0006
Q7X6S7	EB1-like C-terminal motif	0.28	0
Q5VNU8	Uncharacterized protein	1.39	0.0111
Q0J7E9	transposon protein	0.46	0
Q0DIK0	Mitochondrial fission 1 protein	0.31	0
A0A0P0XSC9	Plant protein of unknown function (DUF641)	0.66	0.0068
Q944E9	ATP-binding protein	0.51	0
B8BFS3	Amidase domain-containing protein	0.7	0.0179
A2YZZ9	Transposon protein	1.34	0.024
Q5QLE5	Putative acyl-CoA synthetase	0.64	0.0031
B2ZX90	Chromatin assembly factor 1 subunit FSM	1.31	0.0369
Q10P12	V-type proton ATPase subunit a	0.46	0
Q93WY5	Glutathione S-transferase	0.58	0.0003
Q10RN9	small GTP-binding protein RAB5B	0.56	0.0001
B9FLZ8	Ankyrin repeat	0.49	0
B9FQL8	Cadmium/zinc-transporting ATPase	0.68	0.0108
Q0D9J0	Os06g0713900 protein	0.55	0.0001
Q5JJV9	Amino acid kinase	0.69	0.0129
B9GBU7	Domain of unknown function (DUF2828)	0.67	0.0088
B8B307	Putative esterase	1.39	0.0104
Q6AVZ8	Class III peroxidase 65	1.32	0.0349
B8ANU7	YTH domain-containing protein	0.67	0.0082
A0A0P0YCG8	Os12g0629600 protein	0.73	0.0356
Q03200	Light-regulated protein	1.48	0.0026
Q6ZBZ2	Germin-like protein 8-14	1.54	0.0008
A2YWV7	Lipoxygenase	0.58	0.0003
B8BKE8	Cytochrome P450 71C1	1.3	0.0421
Q10F16	2Fe-2S iron-sulfur	0.45	0
A0A0P0W4K0	Os03g0807700 protein	0.69	0.0121
Q0DTX5	Superoxide dismutase [Cu-Zn]	0.62	0.0014
A0A0P0VUH2	Os03g0203900 protein	0.66	0.0051
Q6L5I6	protein IQ-DOMAIN 31	0.26	0
P0C5A4	Late embryogenesis abundant protein, group 3	0.64	0.0034
