# Supplementary material for: The Memory of Rice Response to Spaceflight Stress: From the Perspective of Metabolomics and Proteomics
Source: Int J Mol Sci. 2022 Mar 21;23(6):3390. doi: 10.3390/ijms23063390 (PMC8954569; doi:10.3390/ijms23063390)
Supplement: Supplementary file 1 [file ijms-23-03390-s001.zip › table S3.xls]

## Sheet: Sheet2
Table S3. GO annotation of differential proteins in TLS
GO ID	GO name	P-value	Count
GO:0006979	response to oxidative stress	4.22e-05	14
GO:0042592	homeostatic process	0.000163	14
GO:0015979	photosynthesis	0.000451	12
GO:0019637	organophosphate metabolic process	0.000484	22
GO:0044281	small molecule metabolic process	0.000805	38
GO:1901564	organonitrogen compound metabolic process	0.000813	40
GO:0055114	oxidation-reduction process	0.00113	44
GO:0009582	detection of abiotic stimulus	0.00258	2
GO:0022607	cellular component assembly	0.00324	15
GO:0070271	protein complex biogenesis	0.00411	11
GO:0006996	organelle organization	0.00546	24
GO:0018904	ether metabolic process	0.00608	3
GO:0009581	detection of external stimulus	0.00656	2
GO:0009314	response to radiation	0.00692	10
GO:0006081	cellular aldehyde metabolic process	0.01	8
GO:0006952	defense response	0.0102	11
GO:0034975	protein folding in endoplasmic reticulum	0.0113	1
GO:0019419	sulfate reduction	0.0113	1
GO:0006091	generation of precursor metabolites and energy	0.0131	11
GO:0051186	cofactor metabolic process	0.015	12
GO:0044723	single-organism carbohydrate metabolic process	0.0183	17
GO:0006082	organic acid metabolic process	0.0188	25
GO:0044711	single-organism biosynthetic process	0.0193	32
GO:0005975	carbohydrate metabolic process	0.0198	26
GO:0006903	vesicle targeting	0.0225	1
GO:0010497	plasmodesmata-mediated intercellular transport	0.0225	1
GO:0051173	positive regulation of nitrogen compound metabolic process	0.0266	6
GO:1901135	carbohydrate derivative metabolic process	0.0271	17
GO:1901700	response to oxygen-containing compound	0.0296	10
GO:0009891	positive regulation of biosynthetic process	0.0302	6
GO:0043207	response to external biotic stimulus	0.0306	7
GO:0043933	macromolecular complex subunit organization	0.0314	15
GO:0051668	localization within membrane	0.0336	1
GO:0051656	establishment of organelle localization	0.0419	3
GO:0048731	system development	0.0443	13
GO:0061024	membrane organization	0.0469	7
GO:0007165	signal transduction	0.04989	9
