# Supplementary material for: The Memory of Rice Response to Spaceflight Stress: From the Perspective of Metabolomics and Proteomics
Source: Int J Mol Sci. 2022 Mar 21;23(6):3390. doi: 10.3390/ijms23063390 (PMC8954569; doi:10.3390/ijms23063390)
Supplement: Supplementary file 1 [file ijms-23-03390-s001.zip › table S4.xls]

## Sheet: Sheet1
Table S4. GO annotation of differential proteins in TS
GO ID	GO name	P-value	Count
GO:1901564	organonitrogen compound metabolic process	0.000313	40
GO:0009793	embryo development ending in seed dormancy	0.00213	6
GO:0044281	small molecule metabolic process	0.00227	36
GO:0048367	shoot system development	0.00256	12
GO:0009887	animal organ morphogenesis	0.00516	6
GO:1901700	response to oxygen-containing compound	0.00892	11
GO:0006082	organic acid metabolic process	0.011	25
GO:0006996	organelle organization	0.0119	22
GO:0006979	response to oxidative stress	0.0131	9
GO:0009314	response to radiation	0.0145	9
GO:0006403	RNA localization	0.0151	3
GO:0048731	system development	0.0154	14
GO:0055114	oxidation-reduction process	0.0202	37
GO:0009611	response to wounding	0.0206	3
GO:0006903	vesicle targeting	0.0215	1
GO:0010220	positive regulation of vernalization response	0.0215	1
GO:0048437	floral organ development	0.0219	5
GO:1901615	organic hydroxy compound metabolic process	0.0233	7
GO:0048449	floral organ formation	0.0238	3
GO:0019637	organophosphate metabolic process	0.028	17
GO:0051668	localization within membrane	0.0321	1
GO:0048598	embryonic morphogenesis	0.0321	1
GO:0045132	meiotic chromosome segregation	0.0333	3
GO:0048569	post-embryonic animal organ development	0.0345	5
GO:0048645	animal organ formation	0.0402	3
GO:0044712	single-organism catabolic process	0.0439	11
GO:0007165	signal transduction	0.04982	9
