# Supplementary material for: The Memory of Rice Response to Spaceflight Stress: From the Perspective of Metabolomics and Proteomics
Source: Int J Mol Sci. 2022 Mar 21;23(6):3390. doi: 10.3390/ijms23063390 (PMC8954569; doi:10.3390/ijms23063390)
Supplement: Supplementary file 1 [file ijms-23-03390-s001.zip › Table S5.xls]

## Sheet: DEM-TLS
Table S5. The relative content of metabolites in leaves of TLS.
Compounds	adduct	Fold change(SP2/CK)	Average CK	Average SP2	p-value	m/z	rt(s)	CK-1	CK-2	CK-3	CK-4	CK-5	CK-6	SP2-1	SP2-2	SP2-3	SP2-4	SP2-5	SP2-6
4,7,10,13,1 6,19-Docosahexaenoic acid	M+	0.54	65874	35360.1	0.000965834	328.25	69.08	61312.3	63127.8	72853	62288.5	67653.3	68009.3	36488.8	33520.5	36943	35246.9	34940.6	35020.9
1-Aminocyclopropanecarboxylic acid	(M+H)+	0.8	40125.8	32253.5	0.0126153	84.04	393.44	39434.9	38344.6	42647.8	39162.5	40665.7	40499.1	30578.6	31869.8	34582.7	31355.3	33074.7	32059.8
LysoPE(16:0/0:0)	(M+H)+	5.66	4784.63	27061.4	8.56542e-07	454.29	198.92	4656.36	4386.6	5178.92	4933.78	4988.33	4563.78	26725.2	27491.6	26759	26745.1	26800.5	27846.8
1-Palmitoyl-sn-glycero-3-phosphocholine	(M+H)+	6.59	29591.6	194964	4.50235e-06	496.34	193.6	30730.7	28819.1	29484.1	29749.6	29403.8	29362.5	187311	204342	193269	195962	199106	189791
1,2-dioleoyl-sn-glycero-3-phosphatidylcholine	(M+H)+	10.82	4220.99	45656.6	0.000954676	786.6	143.7	4510.39	2778.9	4721.68	3996.26	3784.12	5534.58	46041.9	36958.9	53747.1	41405.1	45651.8	50135
1,3,5-Benzenetriol	(M+H)+	1.75	39326.7	69003.2	0.000237142	127.04	360.79	41407.1	38768.3	39029.8	40520	38560.2	37675	68902.4	72901.4	64901.8	70755.6	68614.7	67943.6
16-Hydroxypalmitic acid	(M+Na)+	0.13	26017	3436.94	0.00012438	295.23	150.07	29370.3	24211.1	25855.7	26491.6	24807.5	25366	2956.36	3481.4	4081.46	3128.65	4134.78	2838.99
2-Hydroxyadenine	(M+H)+	0.11	11332.3	1249.64	0.000165909	152.06	224.1	11140.4	12746.2	10100.4	11683.8	11841.5	10481.6	1113.06	1375.81	724.77	1036.75	656.13	2591.31
3-Hydroxy-4-methoxycinnamic acid	(M+H)+	0.16	72196.5	11768.6	3.57815e-05	177.05	149.58	74279.9	66477.2	75581.4	69923.3	71361.3	75555.9	12029.9	10380.2	12420.8	10813.8	11702.5	13264.1
4-Guanidinobutyric acid	(M+H)+	0.29	108252	31713.7	2.32629e-06	146.09	352.38	108463	107081	110086	108105	108821	106956	34581.4	28778	32690.5	31635.2	30845.3	31751.7
5-Hydroxytryptophol	(M+H-H2O)+	1.66	45754.4	75954.7	0.0182477	160.08	230.98	44418.4	40104.1	53022.7	42214.9	46997.8	47768.5	62695.3	80736.4	84728.7	71359.2	82863.7	73344.9
6-Aminocaproic acid	(M+H-H2O)+	0.16	55904.3	8670.51	4.95739e-05	114.09	45.08	59383.5	57669.2	51696.2	58356.7	54745.1	53575.1	10730.4	6285.83	8578.67	8459.47	7052.13	10916.6
Adenine	(M-H)-	0.7	282165	198919	0.0162619	136.06	167.68	241650	294937	310607	268184	302354	275261	195947	198282	202594	196757	200529	199406
Adenosine	(M+H-H2O)+	0.83	2.26048e+06	1.86498e+06	0.0234346	268.1	167.68	2.25253e+06	2.17711e+06	2.3514e+06	2.2147e+06	2.26426e+06	2.30291e+06	1.85986e+06	1.69619e+06	2.0385e+06	1.77805e+06	1.86694e+06	1.95037e+06
Adenosine 2',3'-cyclic monophosphate	(M+H)+	0.08	13188.3	1028.73	3.2565e-05	330.06	264.99	11775.4	13895.2	13923.4	12456.2	13962.1	13117.7	505.57	1470.45	1259.53	669.45	1353.5	913.88
Ala-Gly	(M+H)+	2.19	58342.8	127715	6.48174e-05	147.08	334.74	59698.7	59564.2	55593.4	59711.1	57844.8	57644.4	128423	120226	134177	124538	127351	131573
Vitamin L1	(M+H)+	0.29	1.22349e+06	356278	5.56376e-06	138.06	283.81	1.21301e+06	1.2351e+06	1.2229e+06	1.22418e+06	1.22856e+06	1.21719e+06	343023	406904	319444	374912	362710	330675
Arg-Ala	(M+H)+	0.31	11018.1	3458.83	0.000501496	246.16	413.03	9894.78	11609.6	11199	10640.9	11666.4	11098	3065.93	2922.3	3637.64	3044.29	3212.33	4870.47
cis-9-Palmitoleic acid	(M+Na)+	0.18	15418.9	2710.39	2.55941e-05	277.22	150.21	16982.5	14346.2	14879.9	15558.4	14361.1	16385.2	2778.87	2235.99	3159.98	2927.45	2336.85	2823.22
Cytosine	(M+H)+	0.28	10882.2	3051.47	5.69897e-05	112.05	236.41	10650.6	11243	10958.2	10881.6	11545.7	10014.5	2370.36	3944.1	2480.42	3561.36	2794.72	3157.83
D-Mannose	(M+NH4)+	0.65	28948.3	18923.2	0.0127802	145.05	258.12	32393.3	28311.1	25540.4	30391.8	27355	29698	17180.1	20246.8	19203.5	18854	19742.5	18312
D-Pipecolinic acid	(M+H)+	0.47	61866.8	29291	2.47547e-05	130.09	304.25	58957.4	63271.1	63098.9	61146.1	63071.8	61655.6	28355.9	31171.5	29360.5	29483.5	30202.4	27172
D-Proline	(M+H)+	0.46	24469.8	11155.4	0.00313732	116.07	305.74	22292.1	28020.2	23116	25643.8	25674.7	22071.8	13051.3	11419.7	8954.42	12422.5	10291.1	10793
Deoxyadenosine	(M+H)+	0.05	19042.4	1026.3	2.30415e-06	252.11	141.22	19010.3	17936.2	19916.8	18355.2	18926.8	20109.3	524.72	1103.66	1614.43	958.49	1682.32	274.16
DL-2,4-Diaminobutyric acid	(M+H-H2O)+	0.1	10938.2	1130.1	1.56329e-05	101.07	373.39	10395.6	10721.9	11213	10324.2	11443.8	11530.5	1501.05	1480.14	1352.47	1522	943.07	-18.14
DL-Indole-3-lactic acid	(M+H-H2O)+	0.25	36122.2	9201.86	3.51853e-06	188.07	254.82	34394.3	36713.7	36822.7	35231.3	36937.7	36633.6	9087.43	9840.68	8980.03	9528.86	9199.24	8574.95
Glycerophosphocholine	M+	0.07	117270	8752.64	0.000114266	258.11	382.22	112330	108145	131399	109894	119808	122044	8521.39	9577.18	7920.1	8752.82	9017.92	8726.42
Ile-Leu	(M+H)+	0.23	23438.9	5402.52	1.23175e-06	245.19	184.53	24181.2	23101.6	23964.8	23408.5	23441.1	22536	5533.88	5409.46	6062.11	5272.17	5919.83	4217.66
Indoleacetic acid	(M+H-H2O)+	0.31	13933.2	4380.38	0.00179295	158.06	53.96	15576.7	11027.3	15030.5	12999.6	12902.2	16062.8	4912.21	3401.05	4745.3	4488.82	4126.63	4608.27
L-Sorbose	(M+NH4)+	1.78	39814.5	70933.3	2.33718e-05	198.1	360.79	39964.3	39226	40197.1	39254.9	39588.8	40655.8	70522.7	73016	68258.9	72031.5	70422	71348.5
L-Aspartate	(M+H)+	0.07	13055.5	889.26	0.000118881	134.04	399.91	11004.4	13151.2	13931	12543.2	13957.8	13745.6	528.75	928.08	1013.26	866.94	940.95	1057.57
L-Carnitine	(M+H)+	0.2	28159.6	5687.5	7.25615e-06	162.11	349.72	29146.5	28468.6	26385.8	28387.7	27071	29498.2	5556.11	5869.01	6448.29	5846.63	5726.23	4678.74
L-Glutamine	(M+Na)+	0.06	72104.8	4613.26	8.87623e-06	169.06	374.31	68286.4	71653	76686.8	69899.2	73866.7	72236.4	4336.65	4807.48	4933.2	4509.08	4770.65	4322.48
L-Histidine	(M+H)+	0.51	15977	8200.54	0.0145355	156.08	432.55	15105.5	15508.6	17329.8	15253.4	16657.6	16007	4885.21	7467.97	11853.5	6572.72	9206.91	9216.89
L-Isoleucine	(M+H)+	0.4	24603	9950.48	0.000106673	132.1	272.04	25565.4	26138	23145.7	25489.9	24861.2	22418	9164.9	9830.93	10297.3	9146.77	9890.48	11372.5
L-Phenylalanine	(M+H)+	0.28	43321.9	12026.2	8.86593e-08	166.09	254.28	43003.4	43738.3	43414	43100.2	43759.8	42915.6	11789.9	12685.1	11117.1	12080.2	12050	12434.7
L-Pyroglutamic acid	(M+H)+	0.46	13686	6317.93	1.97002e-05	147.08	413.41	14620.5	12832.6	13331	13906.2	13225.3	14200.5	6708.41	6290.54	6032.29	6447.98	6363.24	6065.12
L-Tryptophan	(M-H)-	0.22	10107.7	2182.39	4.9529e-05	205.1	254.93	9619.96	10669.4	10489.7	9809.44	10162	9895.54	1335.45	2303	2678.95	1845.66	2984.08	1947.22
Limonene-1,2-epoxide	(M+CH3COO+2H)+	0.24	197727	47093.3	0.000325851	213.15	153.09	220550	178374	193976	199906	185914	207639	48969.7	39101.3	53145.2	43988.5	46400	50955.3
Malvidin 3-O-glucoside cation	M+	0.62	1.70133e+06	1.05671e+06	0.00640672	493.13	129.67	1.63921e+06	1.69137e+06	1.77346e+06	1.66506e+06	1.73236e+06	1.70652e+06	1.11443e+06	831071	1.22487e+06	973170	1.02787e+06	1.16888e+06
N-.alpha.-Acetyl-L-arginine	(M+H)+	0.3	52644	15572.9	1.03103e-08	217.13	364.69	51705.7	52531.9	52671.3	51829	52242.8	54883.2	15445.3	15345	15311.2	15694.4	15530.9	16110.7
N-Acetylputrescine	(M+H)+	0.27	46242.5	12515.1	0.0112649	131.12	326.27	45582.5	47214.5	45568.5	45985.1	46774.7	46329.8	4639.31	5186.47	27391	4782.04	16130.2	16961.4
N-Methylanthranilic Acid	(M+H)+	0.69	20110.8	13841.1	0.0442926	152.07	106.75	22160.2	18759.3	19632	20201.7	18907.6	21004.2	10202.6	13465.1	16971.7	12285.1	15325.1	14797.1
Nicotinamide	(M+H)+	0.44	91752.6	40436.2	0.00312023	123.06	62.89	88379	101541	84847.6	94506.1	92707.8	88534	51526.4	30102.5	39245.1	40596.8	35091.9	46054.2
Nicotinate	(M+H)+	0.58	30630.2	17814.8	0.000127247	124.04	332.76	30585.7	31681.5	29630.5	31449.6	30727.2	29706.9	17004.5	18066.3	18753.3	17902.2	17974.8	17187.8
Norharmane	(M+H)+	3.36	8729.52	29307.6	0.0232634	169.07	93.21	6761.79	7002.68	12432.1	7013.74	9765.11	9401.72	34094.3	18503.3	35039.3	26681.4	26279.6	35247.8
PC(16:0/16:0)	(M+Na)+	17.59	106043	1.86478e+06	3.27223e-05	756.55	145.64	94225.9	79006.2	145536	87014.6	112330	118145	1.72088e+06	1.86435e+06	2.00868e+06	1.79264e+06	1.93693e+06	1.86519e+06
Phosphorylcholine	(M+H)+	0.25	123215	30319.3	0.000465626	184.07	478	113079	123745	132866	118893	128468	122240	22279.6	25041.4	44366.8	23341.2	34733.5	32153.1
Phytosphingosine	(M+H)+	0.08	156402	12136.2	1.58502e-05	318.3	148.86	167610	148773	151972	158542	150160	161358	12470.2	11587.6	12246.3	12441.6	11618.4	12453.2
Pyridoxal	(M+H)+	2.53	17957.4	45459.7	0.0164745	168.06	118.43	19860.5	16702.7	17167.9	17834	16755.1	19424	45515.3	33951.1	57247.4	39293.2	45642.7	51108.4
Pyridoxine	(M+H)+	0.63	38754.1	24327.2	0.00570888	170.08	106.05	40431.5	36427	38238.8	38731	36848.2	41848	21385.8	22719	29373.2	21684.3	25558.6	25242
Raffinose	(M-H)-	0.38	12327.6	4679.84	0.000583877	522.2	440.85	13665.6	11814.8	11900.5	12569	12265.2	11750.7	4051.7	3833.78	6183.83	4389.2	5158.85	4461.69
Ribitol	(M-H)-	5.66	3040.44	17202.8	0.000113112	153.08	370.27	3045.64	2521.99	3266.68	3169.51	3221.47	3017.33	15351	18739.5	17203.4	17477.3	17527.5	16917.8
Sphinganine	(M+H)+	0.13	40161.6	5232.34	1.25987e-07	302.3	129.02	39032.3	40224.1	40037.5	40072.2	40459.8	41143.9	5332.43	5500.14	5471.48	5502.92	5759.2	3827.85
Sucrose	(M-H)-	2.44	11030.1	26882	0.0405331	360.15	393.34	10596.2	10891.9	11363.3	10932.4	11606.9	10790.2	17016.7	34352.3	28777.6	25572	31535.5	24037.9
trans-3-Coumaric acid	(M+H-H2O)+	0.2	19973.9	3991.11	0.0139126	147.04	175.94	16429	27255.9	15984.8	21685.5	21926.6	16561.6	4071.51	3540.6	4283.03	3526.83	4383.19	4141.47
Triethanolamine	(M+H)+	0.25	32544.2	7976.43	3.56173e-05	150.11	153.79	34529.7	31494.6	31500.3	33130.5	31984.3	32625.8	7278.1	7255.68	9811.88	7446.65	8531.39	7534.89
Tyramine	(M+H-H2O)+	0.25	75497.6	19154.8	1.37117e-06	120.08	254.19	73530.4	76706.4	75989.9	75107.6	76029.4	75621.7	18709.6	20770.4	17662.4	19454.3	19704.5	18627.7
L-Leucine	(M-H)-	0.04	147639	6555.87	9.6403e-05	114.09	155.16	159741	130284	151954	145406	140694	157757	6668.61	6620.76	6864.17	6934.98	6784.6	5462.13
4-Hydroxybenzaldehyde	(M+H)+	0.07	32439.2	2369.09	8.19298e-07	123.04	293.29	31759	33049.3	33361.4	32249.8	33541.2	30674.7	2747.7	1811.81	2282.08	2573.67	2160.84	2638.45
L-Glutamic acid	(M-H)-	0.09	14052.2	1316.45	6.99985e-05	147.08	426.28	13879.8	12698.8	15796.9	13426.7	14571.7	13939.1	1757.57	878.98	1340.66	1254.05	1351.41	1316
Caffeic aldehyde	(M-H)-	0.19	17118.7	3307.6	1.7307e-06	165.05	293.94	16443.5	17295.6	17492	16556.6	17684.1	17240.5	3099.72	3503.18	2831.58	2898.64	3460.81	4051.63
DL-homocysteine	(M+CH3OH+H)+	2.9	19103	55353.3	0.0191814	168.06	45.96	20460.2	17852.7	19427.1	19489.4	18188.9	19199.7	72672.3	39839.3	53802.1	56427.3	46901.2	62477.8
L-Kynurenine	(M+H-2H2O)+	0.53	102276	54136.4	0.000966977	173.07	238.48	98550.6	96514.7	112776	97134.5	104549	104130	57998.8	52588.4	51994.6	54823.3	52090.2	55323
(+)-Abscisic Acid	(M+H)+	0.32	18545.8	5884.64	0.00117189	175.09	115.41	18821.8	18735.7	17178.9	18466.9	17921.9	20149.5	3500.17	5649.09	8565.96	4649.36	7550.9	5392.35
Phthalic acid	(M+Na)+	0.43	22596.2	9698.21	0.00108296	184.06	148.38	23703.6	24037	19760.9	23475.3	21675.2	22925	10252.3	8636.46	10116.2	9508.1	8939.84	10736.4
N-Acetylaspartate	(M+NH4)+0	0.29	11738.5	3420.47	0.00707831	193.09	44.42	11320.2	12475.3	10526.1	12105.4	11524.4	12479.7	3415.98	141.61	6143.61	1376.78	3000.15	6444.72
Dodecanedioic aicd	(M-H)-	0.27	49677.1	13355.1	7.00569e-05	195.14	153.07	53527.1	47178.6	49086.6	50468.3	47977.3	49824.6	13718.5	11739.7	15213	12398.5	13278.2	13782.7
Scoparone	[M-H]-	0.48	12977.9	6216.09	0.00162475	207.06	53.22	12112.5	13661.5	14059.7	13308	13974	10751.8	6180.06	4988.35	7749.2	5834.92	5874.05	6669.96
Biotin	(M+H-H2O)+	0.29	23958	6836.81	0.0485385	209.08	114.19	29983.7	12266.6	30143.8	21049	21704	28601.1	7983.89	5238.24	7264.31	7018.34	5940.98	7575.08
2'-Deoxyinosine	(M+H-2H2O)+	0.15	20876.5	3111.48	0.000269917	217.07	191.32	23656.2	19312.8	19493.7	21503.1	19672	21621.5	3723.59	2674.54	3143.1	3239.66	2900.22	2987.76
5'-Deoxy-5'-(methylthio)adenosine	(M+H-H2O)+	0.14	45259.3	6420.81	5.38466e-05	280.09	382.33	43394.6	43082.8	49241.4	43044.4	45959.8	46832.7	5721.88	7546.93	6168.72	6799.6	7239.55	5048.17
13-HPODE	(M+H-H2O)+	0.38	18179.2	6849.79	0.000330708	295.23	52.44	19436.6	17519.8	16784.1	18183.5	17521.5	19629.6	7296.85	6153.66	6634.47	6426.2	6659.56	7928.02
Uridine 5'-monophosphate	(M+H)+	0.09	8637.39	802.37	1.17451e-07	307.03	277.2	8447.56	8893.2	8210.4	8338.18	8949.9	8985.08	1254.08	1069.99	397.3	1317.88	643.89	131.08
2'-Deoxyinosine-5'-monophosphate	(M+H-H2O)+	0.67	34100.7	22764.6	0.0105833	315.05	129.67	34202.3	34340.5	34239.3	34752.4	34222.5	32847.1	24583.4	18151.7	26052.3	21095.8	22473.6	24231
S-(methyl)glutathione	(M+NH4-H2O)+	4.03	5982.94	24093.7	0.000560508	321.12	320.36	7428.03	5166.35	5891.43	6470.49	5292.11	5649.22	20926.8	25630.4	26003.6	23308	25661.5	23031.5
Tangeretin	(M+H-2H2O)+	7.41	21361	158390	9.96168e-05	337.11	370.39	22745.7	20171.4	20327	21114	20429	23379	149217	175676	150566	162377	163182	149321
Gallocatechin	(M+CH3OH+H)+	0.17	12721.8	2104.32	0.00706426	339.11	154.55	14991.8	14247	8857.51	14257.4	11686.3	12290.6	1844.22	1586.9	1856.79	1748.64	2009.37	3580.01
Coniferin	(M-H)-	3.26	6607.76	21566.9	0.00267979	343.14	116.75	6024.88	6921.85	6540.54	6931.34	6697.06	6530.87	19272.9	26495.7	19190.8	22390.3	22796.3	19255.4
Guanosine 5'-monophosphate	(M+NH4-H2O)+	4.65	35371.7	164321	0.0355514	363.09	258.62	31950.6	40882.7	34332.9	36739.1	37470.2	30854.8	206430	204957	81501.4	205955	143163	143918
Taurocholic acid	(M-H)-	4.43	8790.82	38899.9	0.00147268	515.32	106.04	4300.85	10332.4	11428.2	7400.55	10503.2	8779.72	40393.9	32693.3	43437.1	36660.1	37913.4	42301.8
1-Palmitoyl-2-oleoyl-phosphatidylglycerol	(M-H)-	3.46	53664.7	185601	0.0154973	747.52	74.39	50028.9	58085.3	53204.9	53850.8	56140.6	50677.8	240546	127849	187630	183932	158011	215638
20-HETE	(M-H)-	21.6	2220.07	47957.8	0.000665254	319.23	56.48	2014.44	2209.26	2130.52	1626.21	2644.18	2695.84	51751.2	38709.4	53331.5	45495.6	45959.1	52499.9
20-hydroxy-PGE2	(M-H2O-H)-	239.85	3046.64	730725	0.011018	349.2	44.67	1430.66	2742.28	3909.99	2428.32	3324.41	4444.2	892780	405987	894090	648980	650291	892225
3-Dehydroshikimic acid	(M-H)-	0.12	64195.4	7495.87	7.77429e-06	171.03	288.45	67127.7	60391.4	64777.1	63947.9	63069.9	65858.4	7813.87	8259.07	6408.12	8176.13	7725.47	6592.53
9(S)-HOTrE	(M-H)-	0.64	1.10474e+06	705257	0.00513573	293.21	58.8	1.08776e+06	1.08468e+06	1.14187e+06	1.08602e+06	1.11329e+06	1.11483e+06	844075	630408	642097	736917	636202	741846
D-Glucose	(M-H)-	0.55	2.19211e+06	1.20964e+06	0.000890391	179.06	259.76	2.16917e+06	2.1314e+06	2.27484e+06	2.15033e+06	2.20298e+06	2.22391e+06	1.26751e+06	1.35006e+06	1.0114e+06	1.30862e+06	1.1812e+06	1.13902e+06
APIIN	(M-H)-	0.33	299453	97706.9	9.50152e-06	563.14	323.46	288607	299535	310226	294014	304442	299893	104270	98629.2	90582.7	101113	94675.8	96970.6
Arbutin	(M-H)-	3.71	8281.33	30753	0.000432398	271.08	155.08	7603.36	7718.23	9348.4	7666.77	8208.73	9142.5	33924.9	26705.7	31937.3	30143.9	28849	32957.3
cis-Aconitate	(M-H)-	0.58	56207.6	32416.9	0.00539404	173.01	439.16	50351.4	64919.4	53145.9	57423.8	59298.5	52106.5	30516.8	34174.2	32606.6	32301.3	33134.3	31768
Citraconic acid	(M-H)-	0.55	63176.6	34634.1	0.00280534	129.02	439.16	58640.7	72222.9	58718.3	64967.4	65472.9	59037.6	33931.2	35861	33903.1	35239.9	34386.7	34483
D-Aspartic acid	(M-H)-	0.02	45546.2	1129.46	1.18598e-06	132.03	400.14	43586.8	46597.1	46497.7	44998.2	46309.6	45287.7	1633.88	1218.25	386.87	1535.24	1169.4	833.12
D-Fructose	(2M-H)-	0.27	43977.8	11982.9	3.8633e-05	359.12	299.11	43869.8	41212.5	46661.9	42771.4	44103.6	45247.2	12772	12511	10213.1	12944.1	11735.2	11722.3
D-Galactarate	(M-H2O-H)-	1.28	504486	647556	0.00166349	191.02	125.99	491528	502831	519074	496850	511143	505489	662136	613061	667291	637341	640154	665354
D-Ribose	(M+CH3COO)-	3.75	16348.2	61277.9	0.000297316	209.07	266.57	16351.7	17201.5	16044.5	17015.2	16997.4	14479.1	64318.3	65431.7	53723.9	64748.2	59193.5	60251.8
D-Tagatose	(M-H2O-H)-	0.58	135267	78383.4	0.000885571	161.05	259.93	130453	134300	140925	132237	137627	136059	84792.2	83174.3	66722.3	84481.8	75386.1	75743.5
Oxidized vitamin C	(M-H)-	2.59	107862	278970	0.00242436	173.01	167.59	61731.2	125468	136266	94012.5	131077	98617.6	267387	297257	272551	281975	285067	269585
Dihydrothymine	(M-H)-	0.02	67423.6	1481.7	1.66467e-06	127.05	371.27	68046.8	64178.3	70144.6	66507.5	67526.9	68137.3	1801.72	1667.31	1465.64	1626.06	1693.48	635.98
Dihydroxyacetone	(M-H)-	0.72	120468	87238.9	0.020675	89.02	300	114995	124173	122252	119334	123673	118382	99143.6	92014.1	71115.9	95421.4	81324.8	84413.6
DL-lactate	(M+CH3COO)-	2.11	30253.2	63698.7	0.0351081	149.05	322.35	25118.4	20053.1	46017.1	22349.9	32864	35116.6	77705.3	58572.9	54049.1	67997	56203.8	67663.9
Ferulic acid	(M-H)-	0.19	194157	37670.6	0.0022811	193.05	168.33	161961	184029	237088	172588	210545	198732	43440.6	32540.2	37260.3	37696.7	35273.6	39812.2
Galactinol	(M+CH3COO)-	1.76	646363	1.14047e+06	0.00238551	401.13	362.37	662676	605499	669932	634180	637696	668192	1.15169e+06	1.25448e+06	1.01527e+06	1.20347e+06	1.13506e+06	1.08286e+06
L-Asparagine	(M-H)-	0.01	107402	1006.04	9.29474e-06	131.05	374.43	107074	100702	114187	103873	107322	111254	1068.7	559.92	719.13	620.57	375.29	2692.63
L-Malic acid	(M-H)-	2.73	294107	804328	0.0127426	133.01	404.41	226723	346976	308444	286396	328162	267943	947483	884990	580119	916594	732128	764654
L-Threonate	(M-H)-	4.73	33900.8	160350	0.00650051	135.03	327.17	32812.6	34542.3	33687.6	33813.2	34082.8	34466.5	204141	156592	120492	179997	138296	162582
L-Valine	(M-H)-	0.35	34343.7	11877.1	0.000419835	116.07	297.91	34939.8	34332.5	34304.9	34704.8	33926.9	33853.5	14536.7	12667.2	7436.22	13870.7	10110.5	12641.6
Maleamic acid	(M-H)-	0.02	20935.5	510.04	1.28505e-05	114.02	374.4	20487.6	19495.2	22149.8	19538.6	20772.6	23169.4	658.45	144.64	309.12	754.62	140.65	1052.73
Maleic acid	(M-H)-	2.47	93786.8	231392	0.0242203	115	404.22	78843.6	105938	96112.6	92491.8	100898	88436.7	276973	260831	155213	269241	208414	217680
N-Acetyl-D-lactosamine	M-	0.16	22858	3753.91	5.58077e-06	383.14	256.61	21553	22976.6	23901.5	22571.9	23924.7	22220.5	3981.4	4076.56	3097.27	3567.85	3137.67	4662.73
Palmitic acid	(M-H)-	0.4	1.23337e+06	492815	0.00219176	255.23	44.54	1.2218e+06	1.22221e+06	1.25552e+06	1.22175e+06	1.23898e+06	1.23994e+06	632707	286919	559470	460296	423649	593851
Pantothenate	(M-H)-	0.64	64837.8	41646.8	0.00761954	218.1	270.81	63935.3	58183.1	73071.1	60832.1	65251.5	67754	44569	39663.8	41267.7	41902.2	40155.9	42322.3
Phenylpyruvate	(M-H)-	0.25	37489.4	9206.54	3.48897e-06	163.04	53.03	37663.2	36497.9	37681	36713.2	37123.4	39257.6	10228.6	8468.84	8431.62	9720.95	8866.86	9522.34
Quinic acid	(2M-H)-	0.02	36340.2	882.35	8.68591e-07	383.12	336.29	36613.5	35094.3	36965.7	35680.6	36397.8	37289.1	708.98	572.8	1381.68	836.75	1231.16	562.73
Scytalone	(M-H)-	0.32	150652	48435.6	0.0172464	193.05	154.91	194298	151956	106419	173262	129578	148400	54110.9	36061.2	54671.2	45444.2	45635.2	54690.8
Shikimate	(M-H)-	0.15	74128.1	11353	8.49884e-07	173.05	354.04	76175.1	73194.1	73943.9	74578.6	73471.1	73405.5	11609.4	10343	12935.5	11247	11743.4	10239.9
Sinapic acid	(M-H)-	31.99	1297.88	41519.6	0.000237837	223.06	158.54	906.26	914.27	2683.12	693.9	1430.15	1159.6	44659.3	35215	44820	39760.1	40508.1	44155
Stearic acid	(M-H)-	0.5	271065	136118	0.00336444	283.26	43.4	269162	276261	267422	272411	271688	269447	160637	93491.6	154659	127050	123990	156881
Succinate	(M-H)-	2.4	40675.7	97612.9	0.0126747	117.02	385.36	44396.2	37576.1	39913.7	41203.5	38986.3	41978.2	123432	91097.4	78648.6	107013	84385.9	101100
D-Arabitol	M+H)+	0.18	20646.7	3617.56	0.000116205	158.06	42.18	21128.8	19798.1	20409.1	20172.4	20044.8	22326.9	6058.39	1708.64	3137.19	4114.64	2399.26	4287.24
Betaine	M+H)+	0.45	255300	113996	0.00389349	291.2	52.7	249696	294883	221080	272647	258317	235177	132121	109969	99856.3	120966	104942	116119
Deoxyguanosine	(M-H)-	59.46	1753.24	104241	0.000525096	319.19	42.47	1449.39	2872.44	1753.9	2232.03	2697.68	-485.97	117496	84128.6	110792	100824	97574.6	114632
2-Hydroxybutanoic acid	(M-H)-	0.67	84036	56075.9	0.0483061	447.09	293.13	92889.2	78332.2	81124.5	85708.3	79347.6	86814	70425.8	58595.4	39364.1	64262.7	49231.1	54576.1
Manumycin A	(M-H)-	11.78	7838.42	92372.7	0.0001022	549.25	278	7119.8	7824.41	8100.06	7597.36	7910.2	8478.7	99057.3	96155.1	81954.2	98051.8	89418.4	89599.6
