# Supplementary material for: The Memory of Rice Response to Spaceflight Stress: From the Perspective of Metabolomics and Proteomics
Source: Int J Mol Sci. 2022 Mar 21;23(6):3390. doi: 10.3390/ijms23063390 (PMC8954569; doi:10.3390/ijms23063390)
Supplement: Supplementary file 1 [file ijms-23-03390-s001.zip › Table S6.xls]

## Sheet: DEM-TS
Table S6. The relative content of metabolites in leaves of TS.
Compounds	adduct	Fold change(SP2/CK)	Average CK	Average SP2	p-value	m/z	rt(s)	CK-1	CK-2	CK-3	CK-4	CK-5	CK-6	SP2-1	SP2-2	SP2-3	SP2-4	SP2-5	SP2-6
1-Palmitoyl-sn-glycero-3-phosphocholine	(M+H)+	0.28	137054	38856.6	0.000497102	518.32	188.23	131566	124276	155191	127590	139872	143831	39819.3	41300.3	35539.6	40241.9	38734.2	37504.3
1,3,5-Benzenetriol	(M+H)+	0.18	82825.6	15313.1	2.35631e-05	127.04	360.79	80016.5	79820.3	88511.9	80310.3	83911.4	84383.3	13582.6	15827.6	16485	15064	16565.1	14354.2
16-Hydroxypalmitic acid	(M+Na)+	5.41	8839.21	47793.1	0.00201131	295.23	150.07	7638.73	9154.56	9978.35	8814.33	9093.56	8355.76	36932.3	53518.6	52816.8	45023.1	53411.8	45055.7
2'-Deoxy-D-ribose	M+	3.22	3474.57	11190.9	3.12055e-05	134.06	106.34	3003.26	3492.32	4008.3	2991.52	3412.32	3939.7	10773.3	11573.4	11170.9	11567.8	11509.3	10550.9
2'-O-methyladenosine	(M+H)+	5.63	1717.87	9679.55	2.96219e-05	282.12	103.5	1711.44	1580.69	1806.57	2081.25	1524.57	1602.72	8963.49	9799.79	10279.7	9337.26	10152	9545
2-Hydroxyadenine	(M+H)+	12.25	1865.66	22853.7	1.59489e-05	152.06	224.1	1907.15	1795.04	1874.54	2178.57	1689.23	1749.42	23457.7	21109.9	23963.2	22759.3	22615.2	23217.1
3-Hydroxy-4-methoxycinnamic acid	(M+H)+	0.08	24317.9	1839.25	0.00028043	195.06	126.41	22311.1	22577.9	28052.4	22217.5	24862.8	25885.5	1802.09	1885.63	2070.33	2044.17	1599.07	1634.21
4-Aminobutyric acid	(M+H)+	1.76	40230.6	70638.6	3.00821e-05	104.07	367.93	39428	39007.7	42262.1	38744.7	40963.5	40977.5	68849.1	72166	71016.2	70713.7	71873.2	69213
4-Guanidinobutyric acid	(M+H)+	6.08	37192.5	226089	1.53067e-06	146.09	352.38	35642.9	34084.7	42057	34532.1	38467.3	38371	220810	224666	232710	222537	228460	227353
5-Hydroxytryptophol	(M+H-H2O)+	0.02	32394.2	698.28	0.00128896	160.08	230.98	33799	25059.2	38447.5	29189.2	31698.5	36171.6	709.33	732.21	668.02	1046.49	295.12	738.48
6-Aminocaproic acid	(M+H-H2O)+	2.38	12358.5	29420.8	0.00230467	114.09	45.08	9688.63	12879.5	14564.3	11721.7	13800.9	11496.1	32099.2	25552.6	30487.6	28814.9	27549.2	32021.4
Adenine	(M+H)+	2.19	8222.12	17988.4	0.000134717	136.06	96.97	7734.3	7733.58	9128.36	7685.1	7997.78	9053.57	18743.9	17071.4	18192.6	17416.3	17143	19362.9
Adenosine	(M+H)+	0.66	2.25083e+06	1.49288e+06	0.00227571	268.1	167.68	2.18294e+06	2.11195e+06	2.45752e+06	2.14772e+06	2.28521e+06	2.31964e+06	1.5269e+06	1.43461e+06	1.51714e+06	1.48027e+06	1.47635e+06	1.52198e+06
all cis-(6,9,12)-Linolenic acid	(M+H-H2O)+	0.1	27246.5	2808.21	0.0001863	261.22	105.83	26106.8	24832.1	30806.6	24998.4	28183.2	28551.9	2592.72	2957.19	2839.23	2767.76	2867.75	2824.63
Vitamin L1	(M+H)+	6.17	164184	1.01381e+06	2.90388e-06	138.06	283.81	172155	157768	162544	165337	160149	167149	1.04209e+06	970346	1.02913e+06	1.0065e+06	999884	1.03488e+06
Betaine	(M+H)+	1.82	22082.4	40252.5	0.00031546	118.09	271.16	23234.8	22628	20423.2	22730.2	21989.4	21488.5	40334.4	37878.7	42429	39530.5	39682.5	41659.9
cis-9-Palmitoleic acid	(M+Na)+	5.18	5576.77	28876.9	0.00262463	277.22	150.21	4995.46	5142.84	6518.16	5438.23	6187.04	5178.88	21972.6	32930.1	31812.8	27400.2	32741.9	26404
D-Mannose	(M+H-2H2O)+	0.19	20025.9	3789.1	0.00048451	145.05	258.12	18348.4	18699.9	22887	18611.9	20767.2	20841.1	2994.25	3891.07	4574.14	3154.9	4692.28	3427.98
D-Pipecolinic acid	(M+H)+	0.19	33580.8	6470.68	0.000185177	130.09	304.25	30235.7	37195.7	33413.8	33386.7	35475.7	31777.1	6067.91	6004.72	7373.5	5776.7	6382.66	7218.6
DL-3-Hydroxybutyric acid	(M+H-H2O)+	1.44	55020.9	79239.2	0.000389926	87.04	367.94	53522.5	53806.2	57769.7	53240.5	55674.3	56112.1	77803.7	77309.5	82653.9	77459.9	80310.4	79897.7
DL-Indole-3-lactic acid	(M+H-H2O)+	1.87	8221.57	15339.5	0.000759262	188.07	254.82	7800.48	7284.79	9588.94	7425.08	8398.81	8831.33	15965.8	14671.5	15316.3	14850.3	15388	15845.4
Ethanolamine	(2M+K)+	0.11	18785.6	2068.98	0.00191038	161.07	67.02	19786.9	14319.5	22045.6	16855	18425.6	21280.8	1545.23	2166.64	2501.06	1803.39	2023.59	2373.98
Glycerophosphocholine	M+	117.31	2078.4	243821	3.48155e-06	258.11	382.22	1583.09	2054.93	2606	1635.69	2814.66	1776.01	255990	242686	232774	249741	238093	243644
Indoleacetic acid	(M+H-H2O)+	2.99	3834.34	11474.8	0.00955954	158.06	53.96	3868.36	3559.98	4158.47	4102.33	3932.93	3384	9903.89	14729.2	9790.7	12220.5	12370.5	9833.95
Kynurenic acid	(M+H)+	0.04	16280.9	614.53	0.000306785	190.05	182.85	15450.7	14622.9	18942.1	15408.6	16301.1	16959.9	553.17	724.19	705.14	825.66	653.26	225.76
L-(-)Sorbose	(M+NH4)+	0.18	83777.9	15157.3	4.36289e-06	198.1	360.79	80412.6	83845.3	86941.5	82338.6	84967.5	84161.7	14100.7	14887.8	16322.7	14066.6	16098.7	15467.3
L-Arginine	(M+H)+	3.72	24447.6	90904	0.00948124	175.12	511.74	29697	19896.7	23697.3	25157.3	22000.7	26236.6	111213	97145.8	64241.2	103858	81192.4	87773.3
L-Aspartate	(M+H)+	9.08	1698.52	15426.2	1.91249e-06	134.04	399.91	1680.54	1531.3	1980.23	2056.33	1705.19	1237.54	15862.9	15598.5	14844.1	15975.6	15282	14994
L-Glutamine	(M+Na)+	2.26	8959.02	20221.3	0.00078502	169.06	374.31	10575.3	6989.84	9386.84	9266.23	8583.32	8952.61	21437.3	19053.9	20050.2	20436	19255.5	21094.7
L-Phenylalanine	(M+H)+	1.55	21204.9	32955.5	0.000888692	166.09	254.28	20366.4	19877.5	23409.6	20582.2	21733.1	21260.8	34246.2	32221.1	32440.9	33122.1	31922	33780.7
L-Pyroglutamic acid	(M+NH4)+	2.69	35917.1	96773.2	3.11547e-05	147.08	373.62	36044	33864.2	37810.9	35246.7	35802.1	36734.5	101694	92508	96136.4	97243.5	94474.6	98582.1
Limonene-1,2-epoxide	(M+CH3COO+2H)+	2.5	99531.6	248910	0.000608789	213.15	153.09	101394	91298.4	105830	96040.5	98796.7	103829	219707	265867	261191	242938	263270	240485
Malonic acid	(M+CH3CN+H)+	0.08	29688.1	2299.22	0.00714037	146.04	119.66	30825.5	19822.7	38532.2	24856.6	29409.3	34682.5	2436.88	2232.13	2139.43	2209.19	2369.19	2408.47
Maltotriose	(M+NH4)+	0.04	19538	866.45	0.000115304	522.2	421.23	19601.6	17304.4	21672.8	17973.9	19935	20740.2	1095.86	807.54	734.73	1051.68	533.28	975.58
Malvidin 3-O-glucoside cation	M+	0.03	2.12572e+06	62578	2.1673e-07	493.13	129.67	2.18182e+06	2.09034e+06	2.10525e+06	2.13611e+06	2.09744e+06	2.14338e+06	67714.4	60270.2	59792	63739.7	59651.8	64300.2
MG(18:2(9Z,12Z)	(M+H-H2O)+	0.17	19443	3380.55	0.0460234	337.27	68.85	13951.1	13804.4	30578	13728.2	22626.8	21969.5	2523.67	3695.68	3922.25	3373.02	4209.17	2559.52
N-.alpha.-Acetyl-L-arginine	(M+H)+	2.11	27402.4	57914.1	0.000212922	217.13	364.69	25315.8	25941.5	30974.4	26120.7	28876.8	27185.2	60935.9	56832.9	55813.3	58765.3	55952.7	59184.8
N-Methylanthranilic Acid	(M+H)+	2.13	14311.4	30438.3	0.0127232	152.07	106.75	6905.46	18071.5	18071.9	12653.8	18352.8	11813	29169	31442	30644.4	29806.2	30890.9	30677
Nicotinamide	(M+H)+	0.18	70658.2	12831.5	0.000752666	123.06	62.89	81979.9	60706.2	69339.3	71374.7	65043	75505.9	13849.4	11217.6	13298.4	12657.5	12305.5	13660.6
Nicotinate	(M+H)+	0.3	27116.8	8263.44	3.75468e-06	124.04	320.65	27678.2	26778.9	26925.2	27008.9	27208.8	27100.8	9059.35	7990.03	7633.87	8781.41	8231.48	7884.53
Norharmane	(M+H)+	2.2	7160.96	15752.8	0.000363843	169.07	46.42	5926.41	7628.11	7802.79	6991.28	7369.79	7247.41	15550.5	15295	16573.1	15848.5	16288.8	14960.9
PC(16:0)	(M+Na)+	0.79	931215	734662	0.00124841	756.55	145.64	916948	963841	912884	940413	938359	914848	702590	764250	737339	733229	750698	719864
Peonidin 3-galactoside cation	M+	0.02	88434	1967.82	1.29045e-05	463.12	133.05	86530.1	83916.4	94932.8	84759.6	89050.8	91414.1	2030.31	2024.49	2038.73	1801.5	2063.54	1848.37
Phosphorylcholine	(M+H)+	6	37105.7	222610	0.00126087	184.07	478	33178.2	33636.8	44419	33192.4	38866.9	39340.8	189958	265940	211816	227873	238817	201254
Phytosphingosine	(M+H)+	0.28	33920.2	9364.02	0.000140768	318.3	148.86	33857.9	31216	36783.2	32049.7	33630.1	35984.1	8086.06	10123.7	10020.7	9275.25	9711.61	8966.76
Pyridoxine	(M+H)+	3.45	19523.8	67357.6	0.000171018	170.08	106.05	14560.8	18499.6	25521.8	16973	21754.6	19833	64185.7	68513.5	69284.3	66078.2	69193.4	66890.8
S-Methyl-5'-thioadenosine	(M+H)+	2.29	24404.7	55796	0.000186921	298.1	97.93	22516	24168.8	26696.7	23583.3	25198.1	24265	59640.6	54939	52972.9	57507.7	53741.7	55973.8
Sucrose	(M+NH4)+	0.12	28990.8	3601.97	0.0479983	360.15	393.34	11233.7	35550.4	40311.1	23555.6	38160.2	25133.9	4205.45	2332.85	4232.07	3274.63	3045.7	4521.14
Tyramine	(M+H-H2O)+	1.64	35742.7	58541.9	0.000815355	120.08	254.19	34065.9	33626.7	39643.1	33389.9	36868.2	36862.2	61664.7	57128.2	56796.2	59702.9	56992.3	58966.9
Fumaric acid	(M+H)+	10.41	926.9	9646.12	8.46898e-06	116.03	400.07	792.28	957.42	1097.14	879.32	1019.47	815.78	9276.95	10271	9358.24	9972.73	9874.11	9123.7
4-Hydroxybenzaldehyde	(M+H)+	2.66	6477.22	17215.8	0.000214931	123.04	293.29	5864.57	6047.42	7452.91	5991.81	6828.8	6677.8	16935.9	16308.7	18400.7	16687.8	17298.5	17663.5
L-Lysine	(M+H)+	7.08	1311.48	9290.35	7.13754e-07	147.11	354.72	1396.07	1405.05	1319.54	1713.04	888.27	1146.9	9291.54	9529.9	8998.04	9057.69	9147.43	9717.5
L-Histidine	(M+H)+	3.58	4363.43	15609.6	0.0154712	156.08	432.55	4268.36	3536.88	5163.51	3908.29	4654.1	4649.45	10283.2	19215.3	17553.8	14447.2	18275.7	13882.5
D-Glucono-1,5-lactone	(M-H)-	0.3	25218.3	7672.74	0.000631351	178.07	94.55	22789	24096	28744.5	23721.9	26270	25688.4	7743.06	7717.36	7604.93	7654.79	7350.33	7965.94
N-Glycyl-L-leucine	(M+H)+	0.08	17448.5	1409.46	0.000102515	189.13	143.34	15347	18105.9	18918.2	16416.1	18045.4	17858.3	1229.29	1291.61	1671.97	937.01	1691.61	1635.24
N-Acetyl-l-leucine	(M+H)+	0.03	208969	6878.51	0.000141963	191.14	101.67	195199	194303	237385	194536	215936	216454	6872.6	6950.5	6813.41	6834.32	6428.93	7371.28
Shikimic acid	(M+NH4)+	0.25	21530.4	5361.18	0.00221019	192.09	94.03	24433.2	22231.4	17928.6	23692.2	19757	21140.1	3702.61	7997.81	4413.35	5486.59	6026.37	4540.35
Ferulic acid	(M-H)-	0.09	14925.9	1326.27	0.000148563	194.08	61.51	15831.8	12931	15876.9	14837	14746.7	15332.2	1109.1	1332.14	1338.6	1205.03	1142.86	1829.87
Dodecanedioic aicd	(M-H)-	2.48	26340.9	65310.9	0.00032128	195.14	153.07	26866	24304.1	27954	25858.5	25934.4	27128.6	58894.9	68640.7	68351.5	64091.9	68408.3	63478
Formononetin	(M+H-2H2O)+	0.01	93934.9	1299.85	1.84909e-05	233.06	259.89	89119.5	91052.4	101540	89705.1	96238.1	95954.7	1145.02	1883.84	1069.41	1613.72	1946.78	140.32
Argininosuccinate	(M+H-H2O)+	0.23	35250	8202.97	0.00067543	255.11	319.65	39681.9	30373.8	35641.3	34971.4	32878	37953.7	9813.4	7469.42	7293.86	8163.91	7263.35	9213.9
Nicotinate ribonucleoside	(M+NH4-H2O)+	0.26	45145.4	11540	0.000752141	255.1	355.92	47410.8	38363.3	49805.5	42392.5	44488.5	48411.7	13205.8	9578.36	11932.9	11499.3	10505.6	12517.7
Uridine	(M+NH4)+	15.83	814.74	12897.9	0.000328298	262.1	433.95	737.43	747.18	1030.42	1162.33	866.52	344.58	10868.9	14414.5	13380.7	12541.1	14379.4	11802.6
13-HPODE	(M+H-H2O)+	2.3	6922.03	15937	5.7019e-05	295.23	52.44	7047.66	6081.96	7735.1	6227.4	6448.62	7991.45	15530.2	16046	16187.3	15827.3	16295.9	15735.6
2'-Deoxyinosine-5'-monophosphate	(M+H-H2O)+	0.05	47400.8	2543.32	0.000110323	315.05	129.67	45477.2	43587.5	53106.9	44864.7	48528.8	48839.6	2600.45	2400.26	2471.9	2833.16	2645.64	2308.52
Xanthohumol	(M+H-2H2O)+	24.5	1905.56	46678.9	0.000361183	319.14	182.59	1965.38	1791.27	2128.08	1930.24	2090.53	1527.87	53612.4	39795.1	46667.7	46265.7	43621.2	50111.6
Tangeretin	(M+H-2H2O)+	0.02	47006.7	1099.49	9.21375e-05	337.11	370.39	50769	41277.3	49034.2	45778.1	45498.1	49683.4	1010.38	1148.89	1028.11	1368.19	1030.48	1010.91
Guanosine 5'-monophosphate	(M+NH4-H2O)+	0.25	95294.9	23390.8	0.00791775	363.09	258.62	82814.9	124350	78847.1	103532	101753	80472.6	22979.5	22451.5	24755.7	22692.8	23111.8	24353.5
Kuromanin	(M+H)+	0.09	38387.9	3358.44	1.67553e-05	449.11	425.02	36722.6	38084.5	40307	37342.5	39349.8	38521.3	4317.63	1363.68	4558.84	2523.68	2675.88	4710.92
Taurocholic acid	(M-H)-	0.1	65338.9	6482.26	0.000101621	515.32	106.04	63453.1	59951.9	72649	61530.4	66338	68110.6	5961.68	6980.69	6476.76	6777.12	7190.37	5506.96
Rutin	(M+H)+	0.08	21015.1	1640.84	0.00019028	611.16	425.02	20459.2	18916.3	23761.8	19714.5	21383.6	21855.5	1762.08	1271.16	1858.74	1475.17	1304.02	2173.86
1-Palmitoyl-2-oleoyl-phosphatidylglycerol	(M-H)-	3.53	92767.2	327699	0.0059182	747.52	74.39	145824	122080	10339	134003	65899.4	78457.9	352582	324998	305522	339217	314779	329097
20-hydroxy-PGE2	(M-H2O-H)-	0	589412	1647.91	0.000537801	349.2	44.67	481000	607097	680100	543561	643805	580908	1318.44	2608.81	1065.95	1824.61	1978.77	1090.87
3-Dehydroshikimic acid	(M-H)-	0.17	90094.1	15548	2.93e-05	171.03	288.45	83604.6	95451.3	91086.6	89812.8	93067.9	87541.2	15511.7	14779.3	16493.7	14760.8	15840	15902.3
4-Pyridoxic acid	(M-H)-	1.91	10127.4	19338.2	0.0495113	182.05	41.79	5986.1	10000.5	14419.2	7919.76	12229	10210.2	23742.5	17774.8	16614.4	20617.4	16990.6	20289.5
9(S)-HOTrE	(M-H)-	1.67	754072	1.25781e+06	0.00570124	293.21	58.8	799404	862833	600146	830702	731874	699474	1.3566e+06	1.20853e+06	1.20835e+06	1.28264e+06	1.20824e+06	1.28248e+06
Alpha-D-Glucose	(M-H)-	0.19	1.32839e+06	252310	0.000940251	179.06	259.76	1.16683e+06	1.25546e+06	1.56296e+06	1.21164e+06	1.40914e+06	1.36432e+06	306065	224638	226047	265532	224893	266688
Benzoic acid	(M-H)-	3.1	9037.65	27989.2	0.0454619	121.03	122.44	6944.41	10584.6	9548.29	9041.44	9979.01	8128.12	30236.8	15790	38011.6	22777.6	27350.8	33768.2
Chlorogenic acid	(M-H)-	0.02	46641.1	1080.64	0.0254039	353.09	258.35	72422.5	29976.6	37631.3	51344	33993.7	54478.7	1112.12	921.83	1060.36	1235.31	1009.29	1144.96
Citrate	(M-H)-	4.31	95854.7	413151	0.00183448	191.02	476.6	63634	78375.8	145378	70566.6	111428	105746	384007	372408	483197	378669	428214	432409
Confertifoline	(M-H)-	0.66	112499	73734.4	0.0152136	233.15	32.17	101734	104687	131040	102713	118096	116725	77580	71594.1	72033.2	74221.1	72186.9	74791.2
D-Aspartic acid	(M-H)-	14.34	3315.68	47541.3	5.50134e-05	132.03	400.14	2637.03	3466.32	3879.83	2904.98	3770.46	3235.44	52058.1	43922.9	46652.3	47921.6	45293.3	49399.4
D-Fructose	(2M-H)-	0.11	35006.8	3876.19	0.00157926	359.12	259.6	32014.1	30035.4	43036.3	30684.9	36673.6	37596.6	5037.44	3349.98	3252.08	4286.73	3416.41	3914.52
D-Galactarate	(M-H2O-H)-	0.27	140918	37357.7	0.00250909	191.02	167.5	110413	155407	156950	133325	155900	133513	39406.6	34136.8	38345	36329.6	36718.7	39209.4
D-Ribose	(M+CH3COO)-	0.06	62857.3	3520.35	0.000163632	209.07	266.57	54557	64804.2	69229.4	59960.8	66741.8	61851	3559.22	3400.36	3573.52	3101.43	3596.59	3891.01
D-Tagatose	(M-H2O-H)-	0.24	83409.8	19917.5	0.000701544	161.05	259.93	74234.7	80344.3	95641.1	77779.4	88107	84352.5	23980.6	16827.5	18879.4	20152.9	17436.7	22227.8
Dehydroascorbic acid	(M-H)-	0.15	800939	117035	0.00075599	173.01	90.86	705895	750981	946005	728932	848608	825212	119139	107832	123922	113927	115794	121598
Dihydroxyacetone	(M-H)-	0.23	74682.8	17521.1	0.00145603	89.02	300	63140.3	72836.5	88085.9	67914	80157.3	75963	19123.8	17168.8	16331	18327.3	16622.4	17553.4
Galactinol	(M+CH3COO)-	0.16	1.39097e+06	219537	5.07461e-05	401.13	362.37	1.27495e+06	1.40449e+06	1.4934e+06	1.33976e+06	1.44873e+06	1.3845e+06	213672	221168	223846	217675	222143	218720
Glyceric acid	(M-H)-	0.09	275256	23730.9	0.00239891	105.02	300.42	217078	265242	343411	241617	304163	280028	25199.5	21590.7	24384.4	23493.3	22549.4	25168.1
Gulonolactone	(M+CH3COO)-	5.36	3962.15	21250.2	1.65428e-05	237.06	134.88	4149.36	3775.61	3847.47	4281.52	4074.84	3644.08	22507	20088.7	21005.5	21421.7	20169.2	22309.1
Kaempferol	(M-H)-	0.05	48966.1	2690.45	0.00362071	285.04	114.22	46924.2	37089.6	63019.9	42264.4	50130.9	54367.3	3202.76	1923.26	2769.98	2674.61	2744.58	2827.53
L-Asparagine	(M-H)-	325.74	890.25	289990	1.85958e-05	131.05	374.43	836.77	728.36	1087.56	481.33	1365.91	841.6	313703	282972	273405	297896	278388	293574
L-Threonate	(M-H)-	0.08	199232	15873.2	0.00315519	135.03	327.17	149058	199705	249061	174247	224189	199134	18252.1	13818.2	15558.8	15914.9	15106.8	16588.1
L-Valine	(M-H)-	1.61	13397.9	21586.6	0.0323169	116.07	297.91	9998.79	12530	17742.1	11293.3	15037.4	13786	23126.2	19627.7	22120.4	21552.6	20481.2	22611.8
Maleamic acid	(M-H)-	92.22	542.56	50036	4.86344e-06	114.02	374.4	439.97	501.55	645.53	22.07	827.48	818.77	51688.5	51320.1	47113	51672.3	49163	49259.1
Maleic acid	(M-H)-	0.54	259071	138979	0.0120441	115	404.22	208064	267410	301685	238152	284923	254191	138298	144707	134023	141550	139861	135431
Manumycin A	(M-H)-	0.02	33431.2	745.79	0.000618049	549.25	278	27959.7	32759.1	39495.2	29910.6	35785.4	34676.9	776.07	714.77	674.75	945.23	613.19	750.76
Myristic acid	(M-H)-	1.42	41788.4	59141.5	0.013511	227.2	46.79	36891.9	42744.9	45793	40209.4	44319.8	40771.3	65486.5	57263.6	54736.5	61719.3	55878.9	59764.3
Palmitic acid	(M-H)-	2.72	452037	1.22806e+06	4.7284e-05	255.23	44.54	450248	445189	460669	448011	453300	454805	1.30968e+06	1.17899e+06	1.19572e+06	1.24393e+06	1.18709e+06	1.25297e+06
Phenol	(M-H)-	0.28	350764	97246.8	0.00143248	93.03	37.13	294561	351932	405696	322815	378906	350676	104445	95997.1	91207	99962	93836.7	98033.6
Quinic acid	(2M-H)-	0.04	66709.3	2853.78	0.00587265	383.12	336.29	51955.3	57856.3	90235.3	55018.6	74405.2	70785.1	3033.13	2657.95	2722.28	2945.23	2226.76	3537.34
Ribitol	(M-H)-	0	341901	1693.02	0.000270621	151.06	230.08	313710	313846	398297	313931	355640	355983	1058.42	2827.92	1312.88	1699.83	1688.04	1571.07
Salicylic acid	(M-H)-	0.24	2.0254e+06	491540	0.000932329	137.02	37.05	1.6796e+06	2.1638e+06	2.23289e+06	1.92155e+06	2.19841e+06	1.95618e+06	519453	495386	459730	507016	477497	490157
Scytalone	(M-H)-	0.17	102459	17700.4	0.0491024	193.05	154.91	65659.9	79190.6	162513	72132.3	120402	114855	20971.7	13249	18955.1	17279.2	16327.4	19419.8
Sinapic acid	(M-H)-	0.02	30190.6	627.68	0.00387971	223.06	158.54	22636.8	28503	39413.5	25632	33601.6	31356.6	543.2	643.81	504.22	604.5	1034.51	435.81
Stearic acid	(M-H)-	2.79	131812	368083	0.000689411	283.26	43.4	138387	146944	110093	142847	128220	124380	412581	342544	349103	377804	345549	380916
Stearidonic Acid	(M-H)-	1.81	166795	301986	0.0235761	275.2	59.45	169246	198610	132433	183582	165387	151512	262722	276173	367135	269556	321219	315107
Succinate	(M-H)-	0.27	134476	36047.9	0.0012751	117.02	385.36	110576	142861	150065	126923	146723	129707	35337.2	35576	37264	35467.9	36544.3	36098.1
Traumatic Acid	(M-H)-	0.1	48856.4	4914.9	0.000153582	227.13	293.29	43662.2	48243.9	54678.2	45785.5	51359.4	49409	5032.46	4574.31	5183.85	5297.68	4619.3	4781.78
Xanthine	(M-H)-	150.65	981.54	147868	8.30556e-06	151.03	211.57	956	1002.07	1031.38	1282.13	1313.59	304.07	156729	139160	147562	147925	143850	151980
Benzamide	(M-H20-H)-	4.04	3745.48	15134.6	0.000381929	102.06	369.6	2075.4	4303.45	4846.57	3197.71	4118.74	3931.02	16207.7	13918.7	15109.2	14944.9	14212.6	16414.4
D-Arabitol	M+H)+	8.78	3431.87	30136.4	0.000433928	158.06	42.18	1778.4	4353.12	4097.51	2755.96	4113.29	3492.91	29100.8	26642.1	34616	27628.1	30470.3	32360.9
Deoxyguanosine	(M-H)-	0.01	179755	1414.11	0.000513573	319.19	42.47	155329	170386	213561	162536	192368	184350	1503.85	931.83	1577.07	1198.69	1589.94	1683.26
2-Hydroxybutanoic acid	(M-H)-	0.05	176818	9584.64	3.07266e-05	447.09	293.13	163472	189878	177030	176923	183472	170132	12274.1	4636.95	11819.3	8153.64	8270.83	12353.1
APIIN	(M-H)-	0.06	275468	17537.2	0.0202616	563.14	297.76	167905	254019	404474	211276	329075	286057	19599.6	15596.7	17329	17646.7	16327	18724.3
N-Acetylmethionine	(M-H)-	0.05	123067	6363.32	0.000246468	617.32	106.6	104209	133859	131109	119113	132891	117223	6345.48	6419.74	6228.28	6527.46	5953.96	6705.02
