# Supplementary material for: The Memory of Rice Response to Spaceflight Stress: From the Perspective of Metabolomics and Proteomics
Source: Int J Mol Sci. 2022 Mar 21;23(6):3390. doi: 10.3390/ijms23063390 (PMC8954569; doi:10.3390/ijms23063390)
Supplement: Supplementary file 1 [file ijms-23-03390-s001.zip › Table S7.xls]

## Sheet: Sheet1
TableS7 Proteins that were remembered across generations under the stress of space flight.Red represents up-regulated protein and green represents down-regulated protein.
Uniport ID	Description	Previously reported (Zeng et al, 2020)		This research
		TLS	TS	TLS	TS
B8B7B6	40S ribosomal protein S12	0.51		0.53
Q8GZX2	LOC496359 protein	0.69		0.67
P0CH34	Ubiquitin-60S ribosomal protein L40-1	1.47		1.56
A0A0P0X8Y8	GRAM domain	0.35		0.36
A2YJ49	Protein of unknown function (DUF3252)	1.77		2.18
Q6Z2K0	G-protein alpha subunit	0.57		0.63
Q9LWS2	60S ribosomal protein L13	0.72		0.67
Q5QNI2	Sodium/calcium exchanger NCL1	0.43		0.49
B9EZU1	Retrotransposon protein	1.7		1.44
A0A0P0X6Q1	RNA helicase (UPF2 interacting domain)	0.73	0.72	0.68	0.57
A0A0P0W5P1	AFG1-like ATPase	0.54	0.63	0.49	0.55
Q75J33	Putative Gag and Pol polyprotein	1.49	1.8	1.74	1.35
A2ZPH0	Glycosyltransferases	0.74	0.51	0.64	0.56
Q93WY5	Glutathione S-transferase	0.73	0.64	0.66	0.58
Q10RN9	small GTP-binding protein RAB5B	0.25	0.7	0.28	0.56
Q761Z0	BRI1-KD interacting protein 124	1.35		1.31
B9FQL8	Cadmium/zinc-transporting ATPase	0.65	0.62	0.66	0.68
Q0DTX5	Superoxide dismutase [Cu-Zn]	0.6	0.56	0.59	0.62
Q6L5I6	protein IQ-DOMAIN 31	0.61	0.22	0.66	0.26
B9F2M6	Protein arginine N-methyltransferase		0.62		0.68
B8BEU0	Histone domain-containing protein		0.66		0.69
A2XDC7	GEM protein 1		0.75		0.72
Q9LDL0	Peroxidase		0.65		0.46
A2X2N4	Leucine rich repeat N-terminal domain		0.58		0.56
Q75KA8	EF hand family protein		0.65		0.71
Q6Z965	12-oxophytodienoate reductase 7		1.39		0.69
B9EUX3	5'-3' exoribonuclease		0.61		0.67
